# Supplementary material for: Au30(PiPr2nBu)12Cl6—An Open Cluster Provides Insight into the Influence of the Sterical Demand of the Phosphine Ligand in the Formation of Metalloid Gold Clusters
Source: MDPI journal article supplement (doi:10.3390/molecules29020286), 2024-01-05
Supplement: s1 [file s1]

## Supporting information

## Table of contents

|                                                                                      |    |
|--------------------------------------------------------------------------------------|----|
| 1. Synthesis.....                                                                    | 3  |
| 1.1 Synthesis of $^i\text{Pr}_2^n\text{BuPAuCl}$ 1 .....                             | 3  |
| 1.2 Synthesis of $\text{Au}_{30}(^i\text{Pr}_2^n\text{BuP})_{12}\text{Cl}_6$ 2 ..... | 3  |
| 2. NMR Data .....                                                                    | 3  |
| 3. Crystallographic data.....                                                        | 9  |
| 4. Quantum chemical calculations: .....                                              | 11 |
| 5 Referenzen .....                                                                   | 28 |

## 1. Synthesis

The reactions were done in an inert gas atmosphere performing standard Schlenk techniques. THF and Cyclopentane were pre-dried with sodium.  $^i\text{Pr}_2^n\text{BuP}$  and  $\text{Au}_{32}(\text{}^n\text{Bu}_3\text{P})_{12}\text{Cl}_8$  were synthesized as described earlier by our group.[1][2]

### 1.1 Synthesis of $^i\text{Pr}_2^n\text{BuPAuCl}$ 1

321 mg (1mmol) (THT)AuCl is solved in 20 ml THF. 0,2 ml (1 mmol)  $^i\text{Pr}_2^n\text{BuP}$  is added. The solution becomes colourless. The solvent is removed after one hour.

### 1.2 Synthesis of $\text{Au}_{30}(\text{}^i\text{Pr}_2^n\text{BuP})_{12}\text{Cl}_6$ 2

406 mg (1 mmol)  $^i\text{Pr}_2^n\text{BuPAuCl}$  is suspended in 20 ml ethanol. 38 mg (1mmol )  $\text{NaBH}_4$  is suspended in ethanol and added quickly to the suspension, which turns black immediately. The ethanol is removed after one hour and the black solid is extracted with 20 ml cyclopentane. The extract is stored at 6 °C. If there is oil, the extract is filtered again. After a few weeks, the  $\text{Au}_{30}(\text{}^i\text{Pr}_2^n\text{BuP})_{12}\text{Cl}_6$  cluster crystallizes in form of black rhombus.

## 2. NMR Data

Devices: Bruker Avancell+400 ( $\text{Au}_{30}(\text{}^i\text{Pr}_2^n\text{BuP})_{12}\text{Cl}_6$ )

Bruker AVIIIHD-300 ( $^i\text{Pr}_2^n\text{BuPAuCl}$ )

The chemical shifts are given in ppm against the external standards  $\text{SiMe}_4$  (1 H, 13 C,) and 85% phosphoric acid (31 P).  $\text{C}_6\text{D}_6$  and  $\text{CDCl}_3$  was dried with 3 Å molecular sieves.

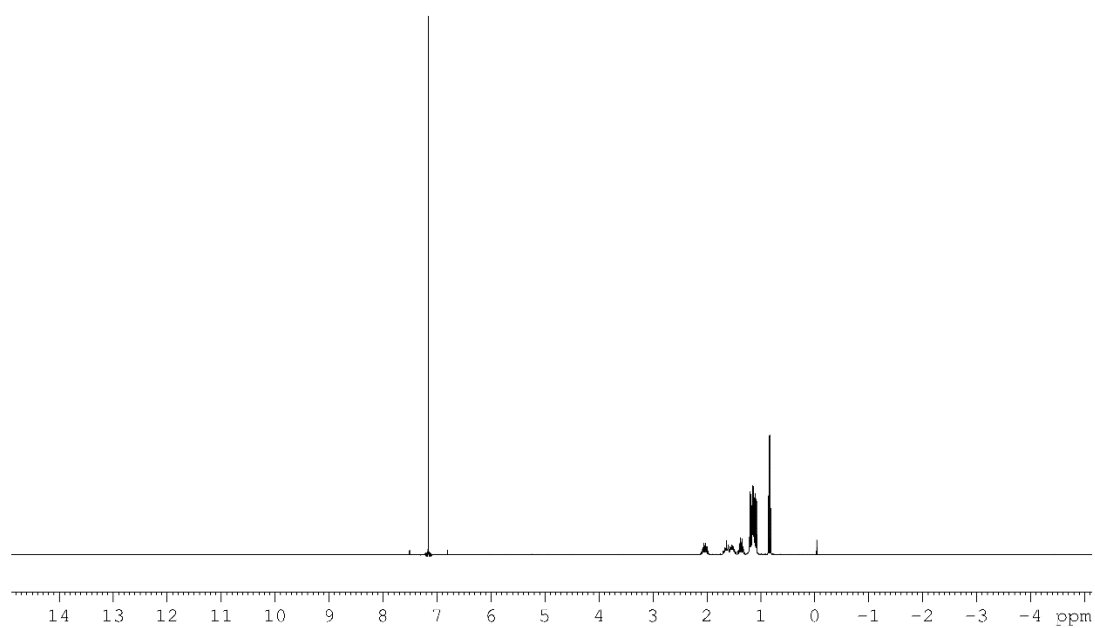

Figure S1:  $^1\text{H}$  NMR-spectrum of **1** at RT in  $\text{CDCl}_3$

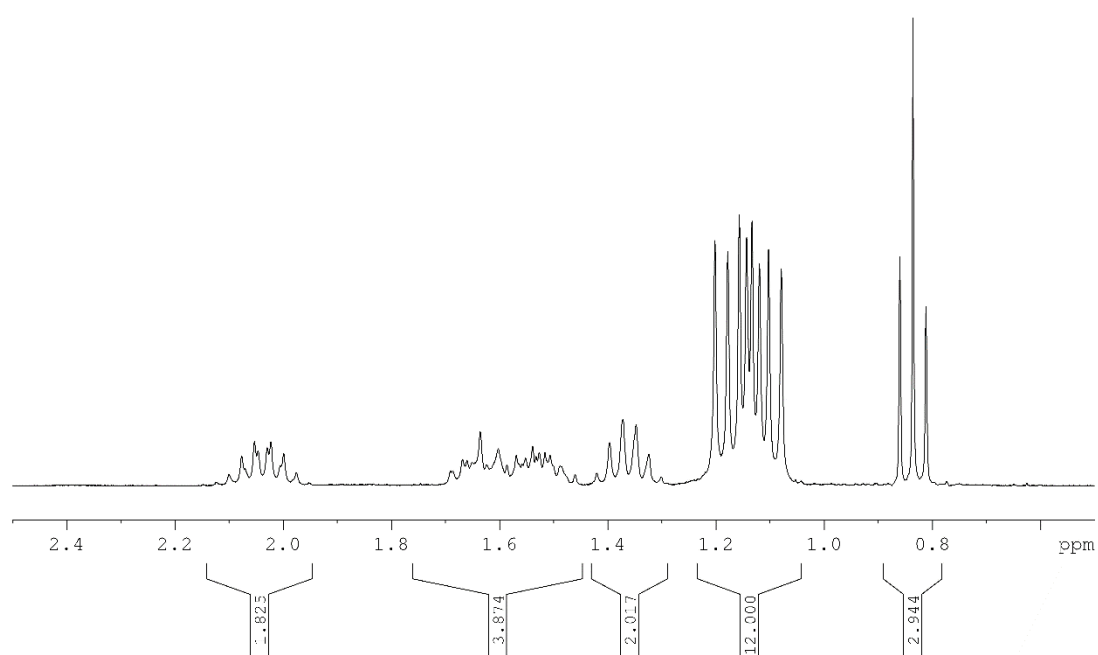

Figure S2:  $^1\text{H}$  NMR-spectrum of **1** at RT in  $\text{CDCl}_3$ , the section between 0.5 and 2.5 ppm is enlarged

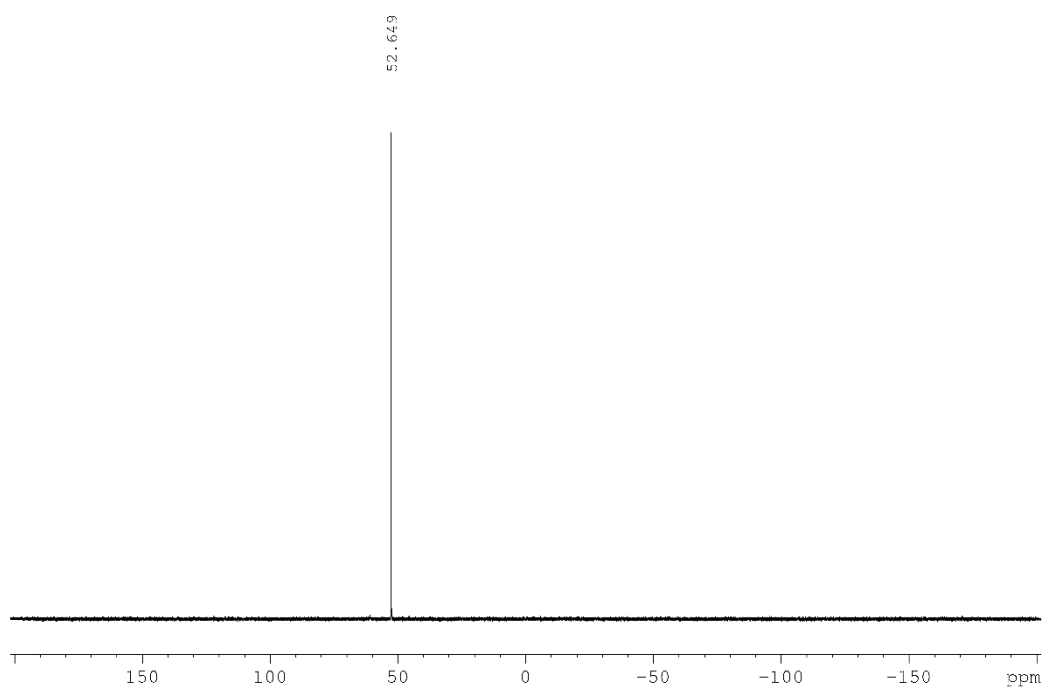

Figure S3: <sup>31</sup>P NMR spectrum of **1** at RT in CDCl<sub>3</sub>

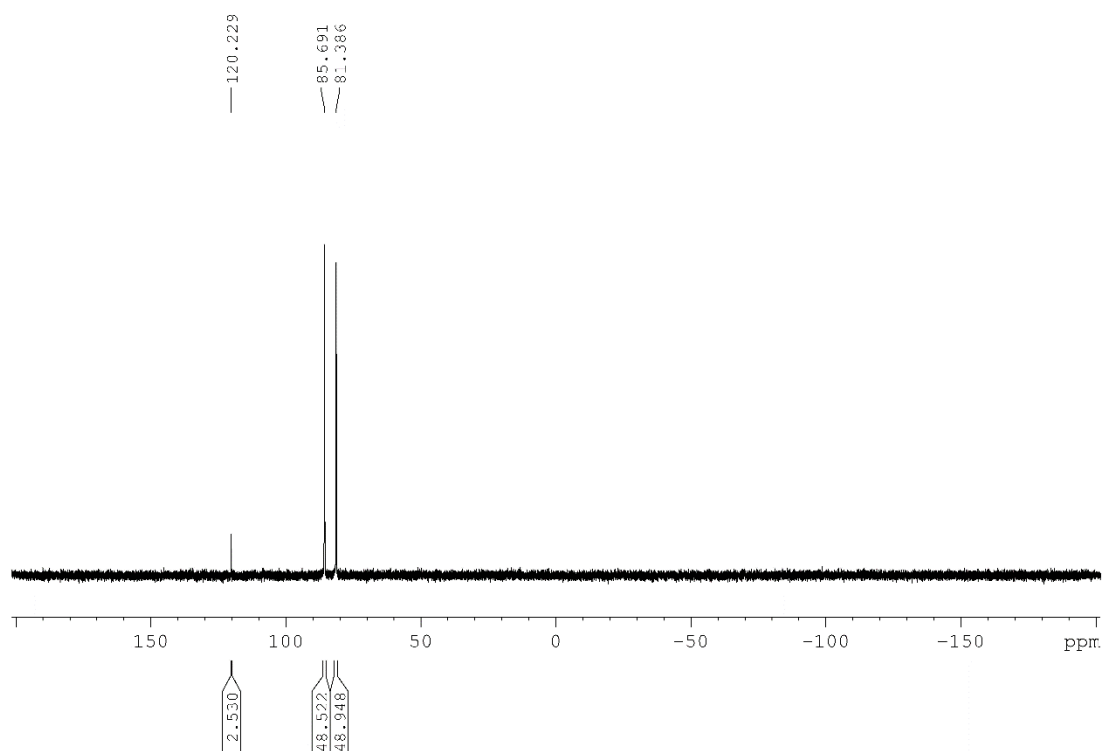

Figure S4: <sup>31</sup>P NMR spectrum of **1** at RT in C<sub>6</sub>D<sub>6</sub>

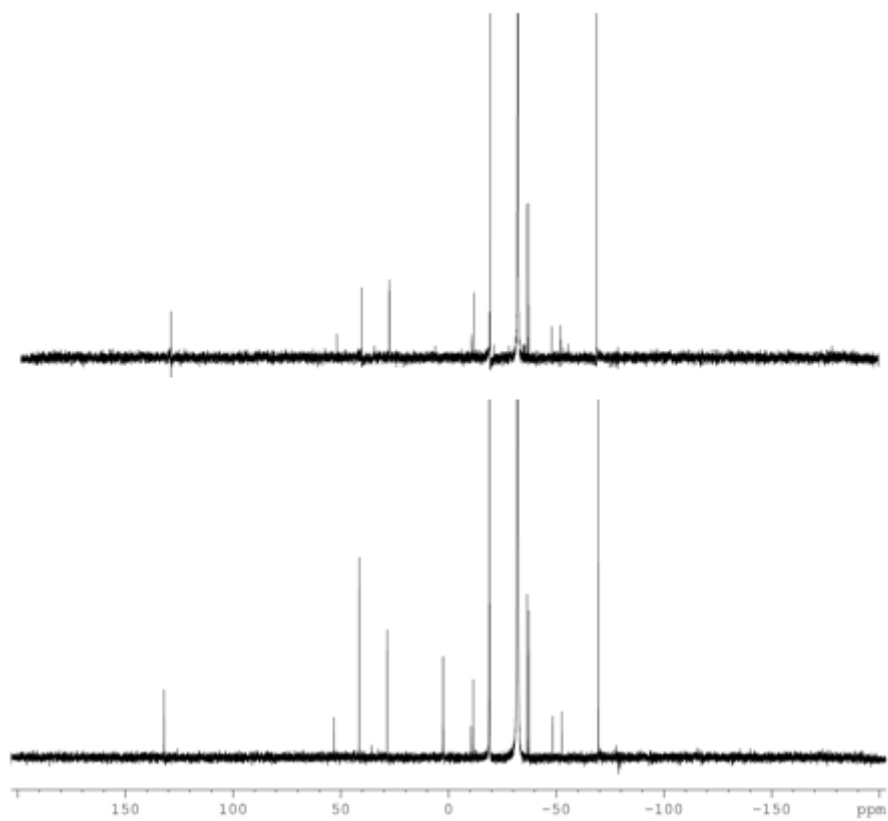

Figure S5:  $^{31}\text{P}$  NMR spectrum of  $\text{PBu}_3$  (up) and  $\text{PBu}_3 + \mathbf{1}$  (bottom) in  $\text{C}_6\text{D}_6$ .

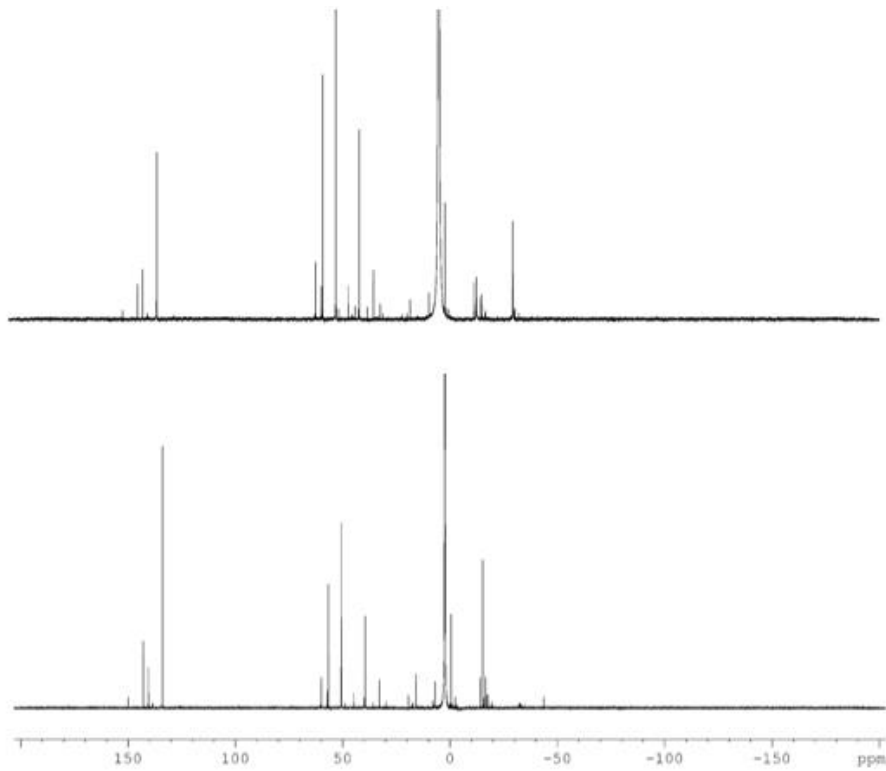

Figure S6:  $^{31}\text{P}$  NMR spectrum of  $\mathbf{2} + \text{P}^i\text{Pr}_2^n\text{Bu}$  (up) and  $\text{P}^i\text{Pr}_2^n\text{Bu}$  (bottom) in  $\text{C}_6\text{D}_6$ .

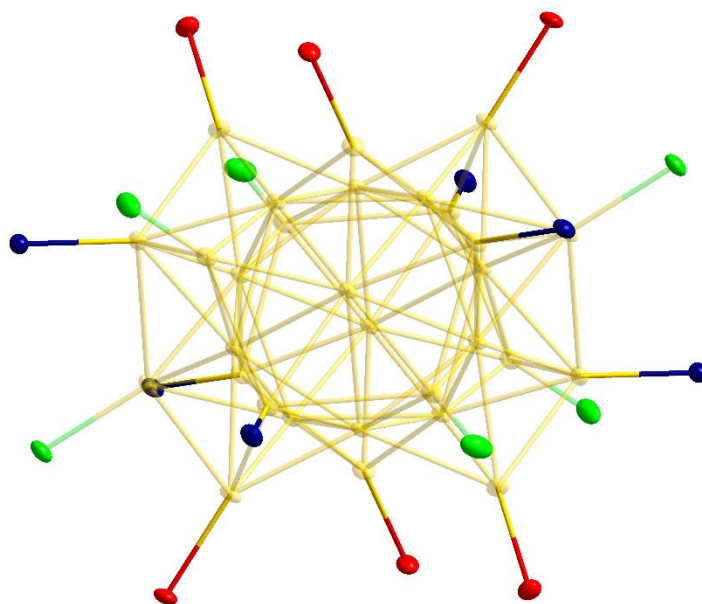

Figure S7: Core of **1** based on the crystal structure (gold: yellow; chlorine: green; phosphorus: blue, red (based on the chemical surrounding))

### 3. UV/Vis

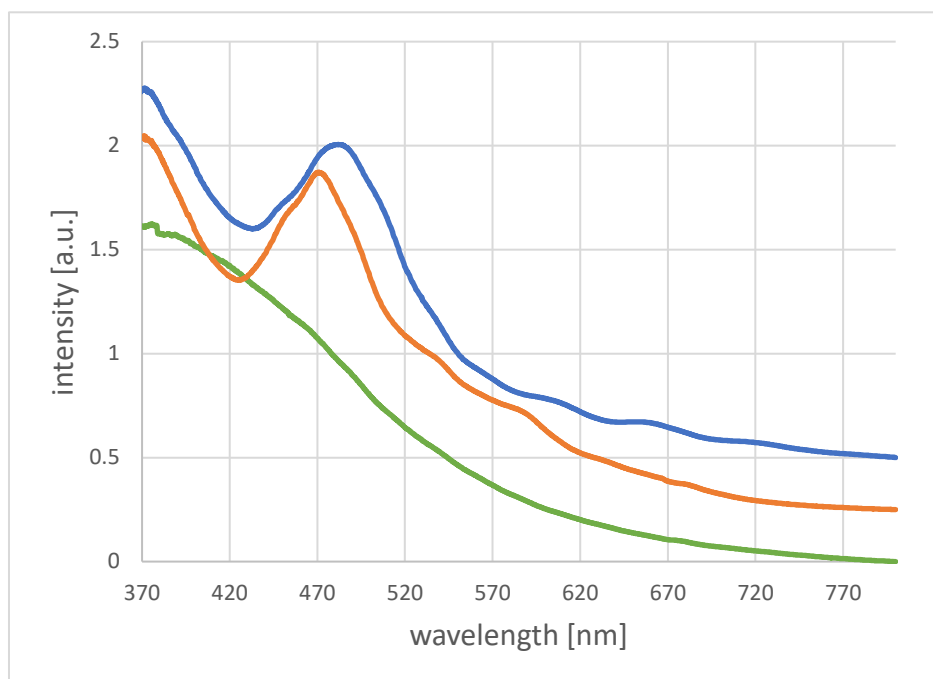

Figure S8: UV/Vis spectra of **1** (orange), **3** (blue) and **3** +  $i\text{Pr}_2n\text{BuP}$  (green) in benzene.

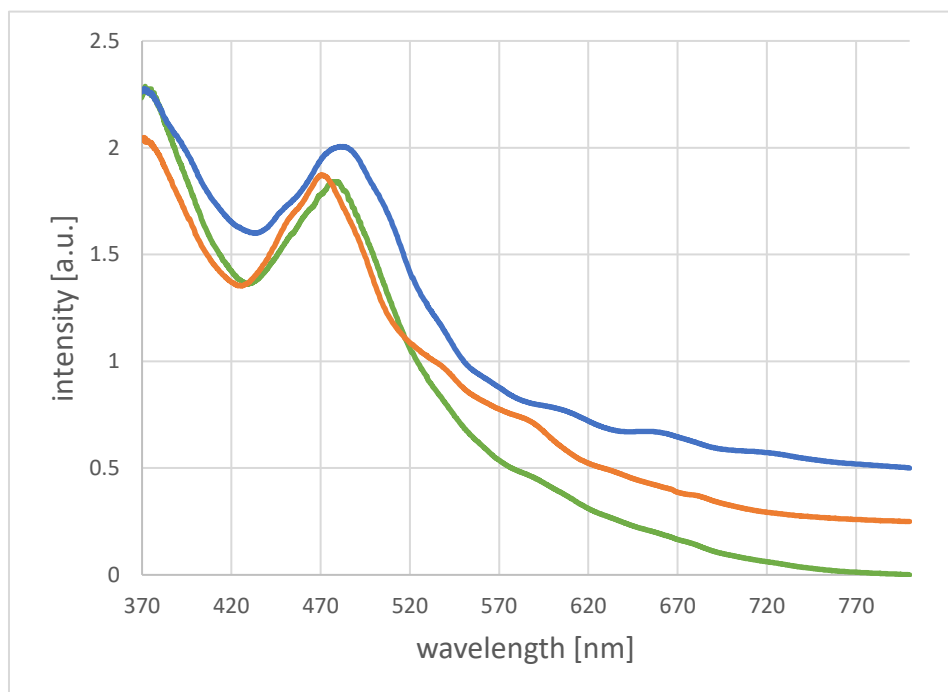

Figure S9: UV/Vis spectra of **1** (orange), **3** (blue) and **1** +  $n\text{Bu}_3\text{P}$  (green) in benzene.

## 4. Crystallographic data

Crystals were mounted on the diffractometer at 100 K. The data were collected on a Bruker APEX II DUO diffractometer equipped with an  $\mu$ S microfocus sealed tube and QUAZAR optics for monochromated MoK $\alpha$  radiation ( $\lambda = 0.71073$  Å) and equipped with an Oxford Cryosystems cryostat. A semiempirical absorption correction was applied using the program SADABS. The structure was solved by direct methods and refined against F<sup>2</sup> for all observed reflections. Programs used: SHELXS and SHELXL[3] within the Olex2 program package. [4]

### *i*Pr<sub>2</sub><sup>n</sup>BuPAuCl **1**

|                                            |                                                               |
|--------------------------------------------|---------------------------------------------------------------|
| CCDC Number:                               |                                                               |
| Empirical formula                          | C <sub>10</sub> H <sub>23</sub> AuClP                         |
| Formula weight                             | 406.67                                                        |
| Temperature/K                              | 100                                                           |
| Crystal system                             | monoclinic                                                    |
| Space group                                | P2 <sub>1</sub> /c                                            |
| a/Å                                        | 9.6698(3)                                                     |
| b/Å                                        | 8.4076(3)                                                     |
| c/Å                                        | 16.4655(5)                                                    |
| $\alpha$ /°                                | 90                                                            |
| $\beta$ /°                                 | 91.9380(10)                                                   |
| $\gamma$ /°                                | 90                                                            |
| Volume/Å <sup>3</sup>                      | 1337.88(8)                                                    |
| Z                                          | 4                                                             |
| $\rho_{\text{calc}}/\text{cm}^3$           | 2.019                                                         |
| $\mu/\text{mm}^{-1}$                       | 11.277                                                        |
| F(000)                                     | 776.0                                                         |
| Crystal size/mm <sup>3</sup>               | 0.461 × 0.194 × 0.056                                         |
| Radiation                                  | MoK $\alpha$ ( $\lambda = 0.71073$ )                          |
| 2 $\theta$ range for data collection/°     | 4.95 to 59.998                                                |
| Index ranges                               | -13 ≤ h ≤ 13, -11 ≤ k ≤ 11, -21 ≤ l ≤ 23                      |
| Reflections collected                      | 20898                                                         |
| Independent reflections                    | 3892 [R <sub>int</sub> = 0.0363, R <sub>sigma</sub> = 0.0304] |
| Data/restraints/parameters                 | 3892/0/123                                                    |
| Goodness-of-fit on F <sub>2</sub>          | 1.041                                                         |
| Final R indexes [ $I \geq 2\sigma(I)$ ]    | R <sub>1</sub> = 0.0182, wR <sub>2</sub> = 0.0422             |
| Final R indexes [all data]                 | R <sub>1</sub> = 0.0207, wR <sub>2</sub> = 0.0437             |
| Largest diff. peak/hole / eÅ <sup>-3</sup> | 1.03/-2.56                                                    |

**Au<sub>30</sub>(P<sup>i</sup>Pr<sub>2</sub><sup>n</sup>Bu)<sub>12</sub>Cl<sub>6</sub> 2**

|                                            |                                                                                       |
|--------------------------------------------|---------------------------------------------------------------------------------------|
| CCDC Number                                |                                                                                       |
| Empirical formula                          | C <sub>120</sub> H <sub>276</sub> Au <sub>30.06</sub> Cl <sub>6</sub> P <sub>12</sub> |
| Formula weight                             | 8224.54                                                                               |
| Temperature/K                              | 100                                                                                   |
| Crystal system                             | monoclinic                                                                            |
| Space group                                | P2 <sub>1</sub> /n                                                                    |
| a/Å                                        | 18.5234(9)                                                                            |
| b/Å                                        | 19.3804(8)                                                                            |
| c/Å                                        | 24.5820(11)                                                                           |
| α/°                                        | 90                                                                                    |
| β/°                                        | 96.1050(10)                                                                           |
| γ/°                                        | 90                                                                                    |
| Volume/Å <sup>3</sup>                      | 8774.7(7)                                                                             |
| Z                                          | 2                                                                                     |
| ρ <sub>calc</sub> /cm <sup>3</sup>         | 3.113                                                                                 |
| μ/mm <sup>-1</sup>                         | 25.248                                                                                |
| F(000)                                     | 7305.0                                                                                |
| Crystal size/mm <sup>3</sup>               | 0.286 × 0.177 × 0.028                                                                 |
| Radiation                                  | MoKα (λ = 0.71073)                                                                    |
| 2θ range for data collection/°             | 3.586 to 49.426                                                                       |
| Index ranges                               | -21 ≤ h ≤ 21, -22 ≤ k ≤ 22, -28 ≤ l ≤ 28                                              |
| Reflections collected                      | 109202                                                                                |
| Independent reflections                    | 14950 [R <sub>int</sub> = 0.0428, R <sub>sigma</sub> = 0.0235]                        |
| Data/restraints/parameters                 | 14950/18/762                                                                          |
| Goodness-of-fit on F <sub>2</sub>          | 1.054                                                                                 |
| Final R indexes [I ≥ 2σ (I)]               | R <sub>1</sub> = 0.0292, wR <sub>2</sub> = 0.0785                                     |
| Final R indexes [all data]                 | R <sub>1</sub> = 0.0346, wR <sub>2</sub> = 0.0836                                     |
| Largest diff. peak/hole / eÅ <sup>-3</sup> | 2.71/-2.38                                                                            |

## 5. Quantum chemical calculations:

All quantum chemical calculations have been done on a DFT level with the B-P86 functional (exchange: LDA + Becke (B88); correlation: LDA (VWN) + Perdew (P86)). The def-SV(P) basis set and additional for the gold atoms, def-ecp was used.

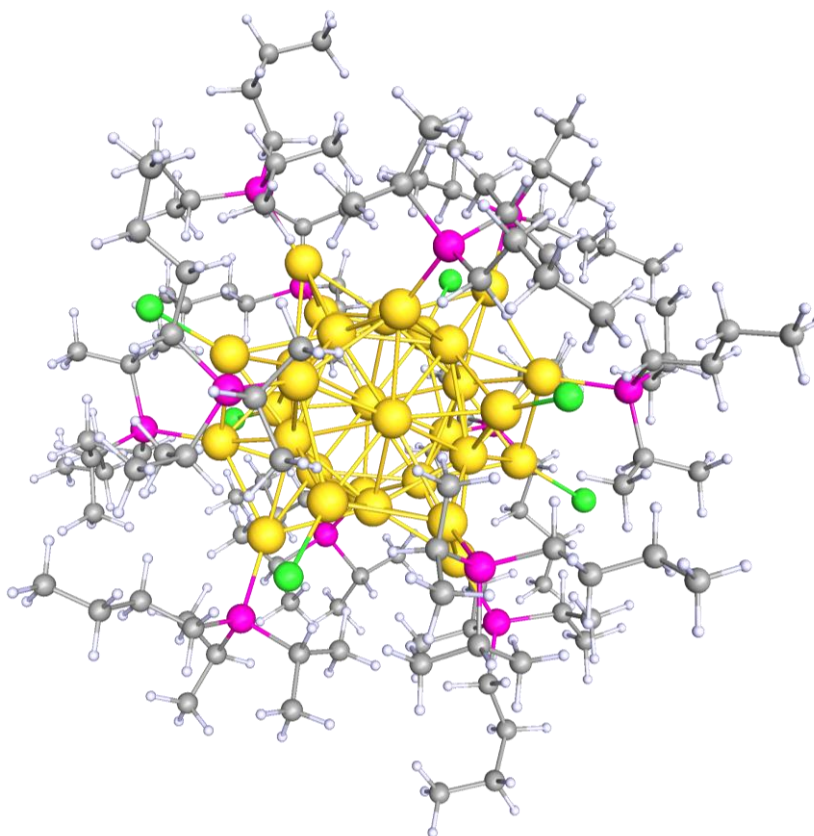

Figure S10: Geometry optimized structure of **2**

Point group:  $C_1$

Energy: -15669.96961061505 H

HOMO-LUMO-Gap: 0.869 eV

Atomic coordinates:

|       |                   |                   |                   |       |                   |                   |                   |
|-------|-------------------|-------------------|-------------------|-------|-------------------|-------------------|-------------------|
| 1 au  | 3.31597561173539  | 36.86894301019531 | 4.17861777406424  | 2 au  | -2.15699388452618 | 36.32463717495765 | 5.01109412255903  |
| 3 au  | 0.88642086853421  | 32.09903277073298 | 3.13907892400418  | 4 au  | -0.07400038794539 | 41.05972971141510 | 2.39325419208094  |
| 5 au  | 4.12170171232049  | 39.65414427929019 | -0.77728339134599 | 6 au  | 4.79964705676733  | 34.19450802639857 | -0.60693953830403 |
| 7 au  | 8.42647455088144  | 37.42219381681051 | 1.67472040696308  | 8 au  | 0.80786047599077  | 39.87919008347568 | 7.84255069473764  |
| 9 au  | 1.26115160515792  | 34.16336351479666 | 8.47242797002129  | 10 au | 4.97881550669558  | 41.87549853028280 | 4.17623817322864  |
| 11 au | 6.31673763518837  | 32.37528006252408 | 4.09531221783939  | 12 au | -4.13711868452662 | 32.89677542755150 | 0.83596714187726  |
| 13 au | -4.82841278993814 | 38.36116098293484 | 0.69025843390446  | 14 au | -7.52781276278237 | 34.97159218470762 | 4.21533193826681  |
| 15 au | -4.58897384041868 | 41.27219897021203 | 5.17455990693119  | 16 au | 0.05430802738412  | 31.49532426204032 | -2.33268045122360 |
| 17 au | 3.81119724407742  | 28.62967829321482 | 0.20914208503837  | 18 au | -1.74949666455577 | 27.84502992717249 | 1.38670604773024  |
| 19 h  | -0.58982847751183 | 28.82295103283428 | 7.58005564202422  | 20 au | -0.91147440317564 | 40.46389924962403 | -3.07350951650906 |
| 21 au | -3.82939068391066 | 43.93389890174657 | -0.14560357609056 | 22 au | 1.72883264058269  | 44.71566339480822 | -1.32639210062942 |
| 23 au | 2.12224632070599  | 36.23529839714933 | -4.93717938204746 | 24 au | 7.50147193860853  | 37.49931696901680 | -4.15040870166590 |
| 25 h  | 7.84524413371321  | 43.62576139340917 | -1.85977207853159 | 26 au | 4.57566518140911  | 31.31634800894177 | -5.10981648880744 |
| 27 p  | 12.19443780944779 | 37.77295540430354 | 4.08073428471472  | 28 p  | 0.67004917617662  | 43.10733861166953 | 10.93878677843884 |
| 29 h  | -1.37065916649981 | 45.61131667225113 | 6.40427529679382  | 30 p  | 2.45773955869323  | 31.15927849163177 | 11.66937129740472 |
| 31 h  | -1.67566135373128 | 34.55201241849461 | 13.34867323672865 | 32 cl | 7.78900669300666  | 45.27557043689794 | 5.73540270517064  |

|       |                    |                   |                    |       |                    |                   |                    |
|-------|--------------------|-------------------|--------------------|-------|--------------------|-------------------|--------------------|
| 33 cl | 8.94296786634786   | 29.97051649042399 | 7.13857653713317   | 34 h  | 9.80769094967756   | 27.84956149920709 | 2.42028703957128   |
| 35 au | -3.34438709146366  | 35.69085327081273 | -4.10592032324545  | 36 au | -8.44818729166506  | 35.12417863923610 | -1.59714805673510  |
| 37 au | -4.99915117776784  | 30.67885709817854 | -4.11831994058442  | 38 h  | -7.87293110452964  | 28.93747669780362 | 1.90065951148981   |
| 39 au | -6.34879234967270  | 40.17951526268079 | -4.00985838551638  | 40 p  | -10.26586628560157 | 35.03687509716986 | 7.79809236636910   |
| 41 cl | -7.69503107072337  | 43.38525843793629 | 8.04779325382141   | 42 au | -0.83749944278920  | 32.67993467371333 | -7.77428568639591  |
| 43 p  | 6.93468397897869   | 25.44604205601074 | -0.09300196776372  | 44 h  | 4.36950825641606   | 24.73633023905651 | 5.01329491786156   |
| 45 p  | -4.45732226179301  | 24.26805831297048 | 1.904811301933587  | 46 c  | 0.05729355081582   | 27.29840618397302 | 8.87649504296946   |
| 47 au | -1.28698580447167  | 38.39605087578741 | -8.40223096056816  | 48 h  | 0.58504064296630   | 43.72878571925465 | -7.52296563563127  |
| 49 p  | -6.94977208628933  | 47.12124499305543 | 0.15090411003940   | 50 h  | -4.38772282003450  | 47.81633635026783 | -4.95910426771044  |
| 51 p  | 4.43430263613579   | 48.30009217276007 | -1.82023193244508  | 52 p  | 10.26289646666507  | 37.59264167428152 | -7.71528890939815  |
| 53 c  | 8.91421408801092   | 45.4399387658300  | -1.93108669065208  | 54 cl | 7.68423437615231   | 29.22024319897444 | -7.97209339592970  |
| 55 h  | 1.36096025017484   | 26.9588171554556  | -6.33391769735166  | 56 c  | 11.72024167985725  | 36.6457976884663  | 7.42261941225499   |
| 57 c  | 14.89487320299428  | 32.78206690042209 | 2.86003722216090   | 58 c  | 13.45334528485467  | 41.02976905284959 | 4.54916076647441   |
| 59 c  | 3.02449269824856   | 41.7544824334179  | 13.56514766271621  | 60 c  | -2.47552381098974  | 43.25008266821377 | 12.49382604395495  |
| 61 c  | 1.36971877525928   | 46.28028637208525 | 9.47620207091848   | 62 c  | -0.85318727779164  | 47.10341600402353 | 7.79513711489949   |
| 63 c  | 2.5957877256687    | 27.94930722983247 | 10.12316858958409  | 64 c  | 5.65029539918042   | 31.48349462021574 | 13.10004590188292  |
| 65 c  | 0.12295864735760   | 30.93586799676998 | 14.37690731333856  | 66 c  | -0.95848472644458  | 33.55089125590729 | 15.04963621954965  |
| 67 c  | 10.1712536563970   | 26.70059789416644 | 0.69084298488747   | 68 p  | -12.21875124661371 | 34.78041842213272 | -4.00121365560100  |
| 69 cl | -7.81586361354069  | 27.27594017627529 | -5.65769727268555  | 70 c  | -8.94093549101759  | 27.12427438947929 | 2.00428297563834   |
| 71 cl | -8.95970520639833  | 42.58539507535134 | -7.06600550751755  | 72 h  | -9.82968275607069  | 44.71777020878288 | -2.35336315945063  |
| 73 c  | -8.5521244550253   | 34.8665978575663  | 10.90125485294055  | 74 c  | -12.46367488369952 | 32.21803131283670 | 7.84030739038860   |
| 75 c  | -12.17646540685265 | 37.98986513439613 | 7.87081599719056   | 76 p  | -0.69527200001542  | 29.45084689683443 | -10.86831594294905 |
| 77 c  | 6.39546923403060   | 22.67295460986205 | 2.05944813077505   | 78 c  | 7.00170725856265   | 24.13478446052779 | -3.35156294778457  |
| 79 c  | 6.10518369687896   | 23.56657570827646 | 4.80850974626174   | 80 c  | -5.36339803724605  | 22.74979813708049 | -1.17994018290324  |
| 81 c  | -2.98551063744317  | 21.79610173860624 | 3.95774087091599   | 82 c  | -7.48601453419057  | 25.13190934057363 | 3.53722728756176   |
| 83 h  | 0.27551750541123   | 25.55782623841359 | 7.71566097689814   | 84 h  | -1.45321425223346  | 26.92733147537324 | 10.29556772812283  |
| 85 p  | -2.47663116935078  | 41.39343933998212 | -11.60609280714298 | 86 h  | 1.62372111978853   | 37.96299850068612 | -13.28688565968101 |
| 87 c  | -0.05294162024732  | 45.25084069730906 | -8.82677698550163  | 88 c  | -10.18977439736260 | 45.86900006019854 | -0.62462205222217  |
| 89 c  | -6.41103996878075  | 49.88846278172007 | -2.00956154573891  | 90 c  | -7.00803535026609  | 48.44051715956028 | 3.40634034871769   |
| 91 c  | -6.12250399425716  | 48.98771441673087 | -4.75657320122808  | 92 c  | 5.32774011827544   | 49.80675100345516 | 1.27441102755354   |
| 93 c  | 2.97034133166304   | 50.78268224984781 | -3.86636502919469  | 94 c  | 7.47145081969578   | 47.45439067399186 | -3.4465228527647   |
| 95 c  | 8.56215745387649   | 37.76471707700027 | -10.82691706765549 | 96 c  | 12.29004555759721  | 40.53985785360267 | -7.64737302390457  |
| 97 c  | 12.36231310553651  | 34.76831603614360 | -7.86216001631739  | 98 h  | 9.27850776404704   | 46.00986949065665 | 0.05627392530250   |
| 99 h  | 10.76716991607691  | 45.06076067368571 | -2.85363592173519  | 100 c | 0.84514123529436   | 25.46328814026789 | -7.72166269618900  |
| 101 c | 9.54302621305608   | 38.08103379014725 | 8.69419632594822   | 102 h | 11.10848198938228  | 34.64364619209633 | 7.18609744124435   |
| 103 c | 14.12726580402254  | 36.71039770957517 | 9.05718704933411   | 104 c | 14.48509155153342  | 32.96915855368093 | 3.46525175836412   |
| 105 c | 15.27616991012863  | 36.15640934088786 | 0.00473008433853   | 106 h | 16.60982026924936  | 36.47634715353045 | -3.87125888528517  |
| 107 h | 11.84513744330700  | 42.09880643216275 | 5.39542137074699   | 108 h | 14.97062398856678  | 40.91027564924429 | 6.00403315966181   |
| 109 c | 14.42121807536264  | 42.49748734748323 | 2.24019622207404   | 110 h | 2.87491432969736   | 44.46057339959951 | 14.73386816474084  |
| 111 c | 5.71395058835768   | 42.50457308439719 | 12.49213463143047  | 112 c | 2.35586840571939   | 40.42628891592818 | 15.2222121538302   |
| 113 h | -3.88372008050770  | 43.44727251978340 | 10.93772907503497  | 114 c | -2.77972921596364  | 41.30858899953266 | 13.24778700143542  |
| 115 c | -2.98115023360592  | 45.22983324615999 | 14.56246529380385  | 116 c | 2.18750669956278   | 48.38005549392080 | 11.31625443122396  |
| 117 h | 3.00809958573614   | 45.85487097961757 | 8.22022255941020   | 118 h | -2.57422738828540  | 47.55991553010988 | 8.91151621837531   |
| 119 h | -0.30890124613922  | 48.82341123232112 | 6.71444867077501   | 120 h | 4.00737293816197   | 28.32306635043225 | 8.60170285506571   |
| 121 c | 3.59138489018769   | 25.74439706706245 | 11.73355752008575  | 122 h | 5.92658631076656   | 29.88236678479078 | 14.43771523966680  |
| 123 h | 6.97677679736364   | 31.17915083981232 | 11.48637301669657  | 124 c | 6.22276704570332   | 33.99561004426611 | 14.43624159410342  |
| 125 h | -1.44015159549065  | 29.79313890884832 | 13.54625855867366  | 126 c | 1.10946397272158   | 29.57394516850333 | 16.75092876451758  |
| 127 h | -2.54057740221749  | 33.34784496135111 | 16.42446191562546  | 128 h | 0.49535671326266   | 34.7776609512413  | 15.9418681104975   |
| 129 c | 12.18426178961167  | 24.71166695206162 | 1.36395573359322   | 130 c | 11.04679543221906  | 28.49998554741510 | -1.41796322219687  |
| 131 c | -11.74815058819866 | 35.90047360440354 | -7.34584390860376  | 132 c | -14.91152932463854 | 36.77969345093043 | -2.77795817474242  |
| 133 c | -13.48691344427201 | 31.52547428593561 | -4.45985703965912  | 134 h | -9.32132508583902  | 26.52695170767412 | 0.02816403539910   |
| 135 h | -10.78573429264003 | 27.51678086387721 | 2.93761856891744   | 136 h | -10.05298865002843 | 34.92562690905189 | 12.37887262640640  |
| 137 c | -6.79408425834898  | 37.14826913157381 | 11.26609266203811  | 138 c | -7.09330882035039  | 32.36174981912701 | 11.13069089056195  |
| 139 c | -14.19417371166674 | 32.26097423236240 | 5.5110956568959    | 140 h | -11.11717163455658 | 30.61771518356074 | 7.58922284501087   |
| 141 c | -13.96344732501359 | 31.77046710191556 | 10.29082831392640  | 142 h | -10.76943409367392 | 39.52239307369657 | 7.52011493122020   |
| 143 h | -13.37881769677097 | 37.92017027220993 | 6.14410598110106   | 144 c | -13.76599026272263 | 38.66105709731662 | 10.21276985917730  |
| 145 c | -3.05679266795130  | 29.83426213441643 | -13.49003077080786 | 146 c | 2.44728438080492   | 29.31588626680256 | -12.43149052461345 |
| 147 c | -1.3822969465266   | 26.27734241682240 | -9.40078936812688  | 148 h | 8.11539030627054   | 21.46929933880326 | 1.90044909724028   |
| 149 c | 4.09620709789775   | 21.12756413918990 | 1.18815940928171   | 150 h | 5.02893129928944   | 23.49496479734168 | -3.71098945457653  |
| 151 h | 7.27440916280223   | 25.79215811542874 | -4.62625680831667  | 152 c | 8.89142701270691   | 22.03157340099595 | -0.42943014479414  |
| 153 h | 7.70864532794867   | 24.75168522854330 | 5.46750460956134   | 154 h | 5.94625372568828   | 21.90273356259771 | 6.08982760935632   |
| 155 h | -5.81891255660139  | 24.41404686562922 | -2.39454230904923  | 156 c | -7.70906182716686  | 21.03363729934280 | -1.16703783583236  |
| 157 c | -3.04835275372521  | 21.42950565122404 | -2.33910225627869  | 158 h | -1.23206977958814  | 21.20861424099699 | 2.9574361950195    |
| 159 h | -2.32487460849587  | 22.85133718610441 | 5.65127155194397   | 160 c | -4.53226185132255  | 19.45652391821650 | 4.73081796261492   |
| 161 h | -8.6238432327777   | 23.36082373650551 | 3.62158094649297   | 162 c | -6.97445022251476  | 26.05019655015313 | 6.24685429619230   |
| 163 c | -2.59590044818755  | 44.60924908656582 | -10.06955858737414 | 164 c | -5.67376222474672  | 41.07960840744636 | -13.02827910051695 |
| 165 c | -0.14557861744876  | 41.59398974752831 | -14.31839440117519 | 166 c | 0.91614643851603   | 38.96999138506710 | -14.98858529608543 |
| 167 h | -0.25945801541025  | 46.99870291998755 | -7.67456833459955  | 168 h | 1.45930405978938   | 45.60498157275698 | -10.24828372810759 |
| 169 c | -12.20244875196250 | 47.85817542488974 | -1.29619508293261  | 170 c | -11.06146671512796 | 44.07241472751967 | 1.48778431969905   |
| 171 h | -8.13043730800886  | 51.09316656679252 | -1.85294397871566  | 172 c | -4.11078969378955  | 51.43527939856001 | -1.14359098155883  |
| 173 h | -5.03271553578657  | 49.07503792002293 | 3.76109580364767   | 174 h | -7.28292884304309  | 46.78635273351613 | 4.68464863759353   |
| 175 c | -8.89010904270478  | 50.55036600105662 | 4.08424517306573   | 176 h | -7.72698274170691  | 47.80182580380976 | -5.41166257982255  |
| 177 h | -5.96322056454918  | 50.64811618457964 | -6.04224999655428  | 178 h | 5.76895181759631   | 48.13833858148405 | 2.48828947889505   |
| 179 c | 7.68179721173532   | 51.51141013261942 | 1.28026920490906   | 180 c | 3.01102394870539   | 51.13528128243104 | 2.42075233788900   |
| 181 h | 1.20645415624151   | 51.35700369505614 | -2.87731232867924  | 182 h | 2.32783707459710   | 49.73846495670412 | -5.57368800226493  |
| 183 c | 4.51744923020630   | 53.13305888678430 | -4.60627972350198  | 184 h | 8.61176821834439   | 49.22491964076703 | -3.49864589491207  |
| 185 c | 6.97679721148912   | 46.57718047505890 | -6.17268065911692  | 186 h | 10.07003063261383  | 37.88762167977426 | -12.29375068939705 |
| 187 c | 6.97298216133829   | 35.38475478575823 | -11.31471782162690 | 188 c | 6.91924356869810   | 40.16200138749789 | -10.94440318150351 |
| 189 c | 14.12991278499965  | 40.42609032030624 | -5.40545652429108  | 190 h | 10.86496680340377  | 42.02551790976861 | -7.20460206941387  |
| 191 c | 13.62687619257845  | 41.28861182123700 | -10.12028366421747 | 192 h | 11.02995082483916  | 33.13404819208366 | -7.91382275289495  |
| 193 h | 13.27918980962786  | 34.67131695749328 | -5.96977440537523  | 194 c | 14.37323710056987  | 34.58336518549598 | -9.96115303052384  |
| 195 h | 2.56530977554550   | 25.00888110611188 | -8.84034312119426  | 196 h | 0.30693075495623   | 23.7437017992     |                    |

|       |                    |                   |                    |       |                    |                    |                    |
|-------|--------------------|-------------------|--------------------|-------|--------------------|--------------------|--------------------|
| 215 h | 0.51801966813838   | 40.65635279704597 | 16.21225566810026  | 216 h | 2.26247548940730   | 38.67291501119993  | 14.06496908965625  |
| 217 h | 3.83726835616433   | 40.15128412047260 | 16.69171083367221  | 218 h | -2.86463412108812  | 47.16259006972429  | 13.73931724516531  |
| 219 h | -1.51184759962073  | 45.14326915913422 | 16.07223778458501  | 220 c | -5.61281059138049  | 44.88893670247512  | 15.76009750958792  |
| 221 h | 3.92163350718635   | 47.88186207668132 | 12.38854996255661  | 222 h | 2.63659218648581   | 50.11402281357539  | 10.21000531461348  |
| 223 h | 0.68284128613487   | 48.88537587107206 | 12.69150999467480  | 224 h | 5.44007767774056   | 26.16393059489765  | 12.63293909067029  |
| 225 h | 2.22949541210252   | 25.16783608024317 | 13.22769727904691  | 226 h | 3.88590325988715   | 24.07208963101564  | 10.48990569766847  |
| 227 h | 4.857766269485423  | 34.32497126503291 | 16.00674962362018  | 228 h | 5.952224271397501  | 35.58706161335081  | 13.08560699123052  |
| 229 c | 8.92340129323627   | 34.06181411035113 | 15.51768089388327  | 230 h | 1.84846390380786   | 27.65391697068238  | 16.34879357856898  |
| 231 h | 2.63789702356345   | 30.67065739178191 | 17.68833717893022  | 232 h | -0.45005505277865  | 29.37156976432285  | 18.15174033662890  |
| 233 h | 11.64516347776397  | 23.55861085797834 | 3.03371758063840   | 234 h | 12.60862062136629  | 23.40978883694915  | -0.22848929130060  |
| 235 h | 13.97485652821624  | 25.69939494575490 | 1.86320821731370   | 236 h | 9.62241671220135   | 29.9985056742064   | -1.79400484820327  |
| 237 h | 12.83635931508899  | 29.43822478972479 | -0.83767704222144  | 238 h | 11.40375122504289  | 27.50176042173888  | -3.23158435583751  |
| 239 c | -9.57682050002536  | 34.45793626432565 | -8.61895272100153  | 240 h | -11.13161948114853 | 37.90165960421956  | -7.11359615452635  |
| 241 c | -14.15876329570405 | 35.83872351977934 | -8.97550849842975  | 242 c | -14.49803842731551 | 39.59082331455803  | -3.38855304547145  |
| 243 c | -15.28390567333418 | 36.40990423757655 | 0.07908182983830   | 244 h | -16.63100650899591 | 36.08721505345498  | -3.78295798380264  |
| 245 h | -11.88114537157531 | 30.44928352442449 | -5.30178933914180  | 246 h | -15.00280812281271 | 31.64661747247567  | -5.91619593561226  |
| 247 c | -14.46133712586218 | 30.06834844168915 | -2.14689687917303  | 248 h | -7.77231547894465  | 38.9931569475559   | -11.05582349838680 |
| 249 h | -5.94642440702624  | 37.07249697966277 | 13.19094208637185  | 250 h | -5.22407786786801  | 37.12816268022561  | 9.86314908097641   |
| 251 h | -8.33211923441250  | 30.67103981083807 | 10.99186430974401  | 252 h | -5.61770809225658  | 32.2403179703681   | 9.6366960427087    |
| 253 h | -6.12573229073137  | 32.27966819788996 | 12.99619250795302  | 254 h | -13.08479431856452 | 32.51379368473421  | 3.74586596486480   |
| 255 h | -15.2562529516630  | 30.45036853193783 | 5.36121658256269   | 256 h | -15.61064945540820 | 33.81114599252794  | 5.62375717091049   |
| 257 h | -12.73710285680271 | 31.65252415260466 | 11.99071411294124  | 258 h | -15.38502454028141 | 33.27918016620917  | 10.62425054654338  |
| 259 h | -15.01026211792902 | 29.94828815471439 | 10.15086874988839  | 260 h | -12.56352744327017 | 38.59507286508251  | 11.94005312122399  |
| 261 c | -14.93088719993932 | 41.32038750970880 | 9.99471092773060   | 262 h | -2.90197558963220  | 28.08824241771623  | -14.65944419935013 |
| 263 c | -5.74545194891209  | 30.03148390613822 | -12.4125393038500  | 264 c | -2.40168490797036  | 32.12497031269533  | -15.14775319979460 |
| 265 h | 3.86134295294318   | 29.12172796161089 | -10.88036120177002 | 266 h | 2.74418888247418   | 31.25841480359009  | -13.18590318010224 |
| 267 c | 2.94850410716468   | 27.33836271733108 | -14.50358898516471 | 268 c | -2.19560544834211  | 24.12796219666893  | -11.23755835605232 |
| 269 h | -3.02045063952967  | 26.69932278048618 | -8.14324661136316  | 270 h | 4.39916826886507   | 20.21125677364232  | -0.67654617803108  |
| 271 h | 3.68683226911647   | 19.60335545049146 | 2.58182679792298   | 272 h | 2.39237341732269   | 22.35363735447444  | 1.04394174393765   |
| 273 c | 8.51136864264119   | 21.08088726686954 | -6.75467131797509  | 274 h | 10.85726182279541  | 22.75640375427270  | -3.84109349495154  |
| 275 h | 8.73257527837718   | 20.40708013497369 | -2.69429000149357  | 276 h | -9.41293067513106  | 22.01083307861005  | -0.42809277995503  |
| 277 h | -8.14726407308706  | 20.47720638917317 | -3.14861130615743  | 278 h | -7.42772679781203  | 19.27050224129808  | -0.05947125404664  |
| 279 h | -1.37251578911686  | 22.69839571597606 | -2.36526706373174  | 280 h | -2.53293276146069  | 19.66926193839905  | -1.30634101197354  |
| 281 h | -3.46906627518284  | 20.89291225336964 | -4.32887741600678  | 282 h | -5.06553315824988  | 18.3743328011630   | 3.01108086006116   |
| 283 h | -6.34132487972380  | 20.04332298074090 | 5.63694408381806   | 284 c | -3.10852137199002  | 17.66281612675852  | 6.53993146042919   |
| 285 h | -6.05941407779012  | 24.58843067966380 | 7.44661205233920   | 286 h | -5.75189907784956  | 27.76142723842696  | 6.23978115325226   |
| 287 h | -8.79478536006930  | 26.56723147122626 | 7.16910616508494   | 288 h | -4.00798094199032  | 44.24707527781058  | -8.54573008638469  |
| 289 c | -3.58097647248892  | 46.81474658672311 | -11.68573591871756 | 290 h | -5.94658690696854  | 42.67765045218774  | -14.37035629265987 |
| 291 h | -6.9950828530915   | 41.39370126569501 | -11.41211949976903 | 292 c | -6.25970726602533  | 38.56548068955670  | -14.35486527790128 |
| 293 h | 1.42694096162399   | 42.72733404899024 | -13.49247471918275 | 294 c | -1.12673531005126  | 42.95825877418864  | -16.69330022240811 |
| 295 h | 2.5010297292281    | 39.16022628141649 | -16.36203911405369 | 296 h | -0.54663730848650  | 37.75498524726162  | -0.86226454691508  |
| 297 h | -11.66501221132395 | 49.01118278910016 | -2.96655258013783  | 298 h | -12.62514302861207 | 49.16021286694104  | 0.29664847018714   |
| 299 h | -13.99367492806260 | 46.87061472343510 | -1.79355613894618  | 300 h | -9.63614207944823  | 42.57280974432297  | 1.86159822226869   |
| 301 h | -12.85218909811590 | 43.13353603389324 | 0.91226317124103   | 302 h | -11.41410264093487 | 45.07251489360387  | 3.30123119058437   |
| 303 h | -4.41132819856013  | 52.35484035946028 | 0.71989575520562   | 304 h | -3.70272383683999  | 52.95699086191049  | -2.54032426829360  |
| 305 h | -2.40739565241581  | 50.20864726597738 | -0.99918570229800  | 306 c | -8.50657073185575  | 51.49872871356452  | 6.80977960906529   |
| 307 h | -10.85865546853059 | 49.83303504126062 | 3.89534877585603   | 308 h | -8.72476529932458  | 52.17448990040236  | 2.74944250063064   |
| 309 h | 9.38763016436297   | 50.52322593329441 | 0.56091834429707   | 310 h | 8.10374830792928   | 52.06967864708393  | 3.26480278859170   |
| 311 h | 7.42076905532548   | 53.27338589074560 | 0.16586407330005   | 312 h | 1.32925888997531   | 49.87400661905919  | 2.43403206948493   |
| 313 h | 2.51002299566357   | 52.89967511257977 | 1.38802718392824   | 314 h | 3.42119428338410   | 51.66665915766497  | 4.41410613695041   |
| 315 h | 5.00837779474198   | 54.21521201488173 | -2.87384168648249  | 316 h | 6.34869936355076   | 52.56016297797302  | -5.47606064849576  |
| 317 c | 3.11983297603209   | 54.92041906074762 | -6.44180182777364  | 318 h | 6.06274991525222   | 48.05457691508451  | -7.35378157513697  |
| 319 h | 5.76028841876352   | 44.86204399371259 | -6.19981274845684  | 320 h | 8.80373868706417   | 46.08452432893039  | -7.09472902862809  |
| 321 h | 8.08747076497064   | 33.61012154704638 | -11.23160700174069 | 322 h | 6.09657773681127   | 35.514602741525689 | -12.2395964170587  |
| 323 h | 5.42595254058156   | 35.20382891313127 | -9.89927373389930  | 324 h | 8.01622425233164   | 41.93063883037430  | -10.66160010397091 |
| 325 h | 5.40229982699608   | 40.09037772710806 | -9.48704059977094  | 326 h | 5.99399058554254   | 40.28951760385916  | -12.82868758950026 |
| 327 h | 13.11647098600056  | 39.9885862117619  | -3.61910823109550  | 328 h | 15.09840829144117  | 42.27886358814231  | -1.56498208485053  |
| 329 h | 15.62088900619395  | 38.97026022418416 | -5.68902886154428  | 330 h | 12.29836089156571  | 41.50447346379946  | -11.73092283179682 |
| 331 h | 15.09777001914034  | 39.90156305362222 | -10.68126257741645 | 332 h | 14.58737630047826  | 43.14456007636847  | -9.85676850449395  |
| 333 c | 15.82630828348567  | 32.05148942764788 | -9.96624076975426  | 334 h | 13.48634047482423  | 34.86475845399576  | -11.85252071348395 |
| 335 h | 15.76601039375351  | 36.13950603621139 | -9.72494034030764  | 336 h | 13.29806697374410  | 46.18857498149985  | 3.62621609026979   |
| 337 h | 16.40867955810008  | 45.2765230941357  | 4.53067763304344   | 338 c | 16.16400337467088  | 46.76801480105051  | 0.70935176625727   |
| 339 c | -6.23955482849503  | 46.89843768832631 | 17.75362780624388  | 340 h | -7.05591416866641  | 44.91728528870244  | 14.22766610065127  |
| 341 h | -5.73074893199377  | 42.97129346618642 | 16.62863871543171  | 342 h | 10.29565901625778  | 33.78496145089719  | 13.94330544641739  |
| 343 h | 9.18903124153816   | 34.12216160492037 | 16.80392995895583  | 344 c | 9.54442648132029   | 36.50669966688621  | 16.94615960504499  |
| 345 h | -7.78249642212717  | 34.64295580719407 | -7.53804969751730  | 346 h | -9.25520251813880  | 35.25492316995224  | -10.53780812939346 |
| 347 h | -9.98928480842964  | 32.40939453664619 | -8.83152455271284  | 348 h | -15.78832954831474 | 36.82215305297871  | -0.80743313291492  |
| 349 h | -14.75077886821710 | 33.87434811937699 | -9.43476726058528  | 350 h | -13.77680020219974 | 36.80893311274185  | -10.80383050829921 |
| 351 h | -14.50394890789453 | 40.01076754891552 | -5.44115174062513  | 352 h | -12.65724820726696 | 40.26355008773505  | -2.63216969686626  |
| 353 h | -16.02681109131152 | 40.73207735645445 | -2.49784147458127  | 354 h | -15.70554050051228 | 34.42101024235831  | 0.58293544072393   |
| 355 h | -16.89004132966649 | 37.59604728976154 | 0.74840534571549   | 356 h | -13.55587976861546 | 36.98655842107862  | 1.13076249542837   |
| 357 c | -15.09811045055149 | 27.30783489162943 | -2.81706748468877  | 358 h | -13.00588713900968 | 30.10718297493320  | -0.62600942450877  |
| 359 h | -16.18391939455345 | 30.99393804714230 | -1.36457900650983  | 360 h | -6.26645549497458  | 28.42377282633889  | -11.16674906344178 |
| 361 h | -7.14368042867380  | 30.11855216840471 | -13.98425174768991 | 362 h | -5.94158943898734  | 31.77566337298172  | -11.25945788174735 |
| 363 h | -0.56306518644979  | 31.90540817064116 | -16.13871852488397 | 364 h | -2.31777236751968  | 33.87887311144614  | -13.99076384727631 |
| 365 h | -3.88532327303729  | 32.39127421807807 | -16.61665804420769 | 366 h | 2.84976962140003   | 25.40553892105510  | -13.67826701847831 |
| 367 h | 1.46615155651429   | 27.41531151674559 | -16.0010996107825  | 368 c | 5.56699083131400   | 27.69430529443050  | 15.72467570910764  |
| 369 h | -3.93289961973274  | 24.66411971754158 | -12.30792966529819 | 370 h | -2.63685740169818  | 22.43850311989393  | -10.12894365330014 |
| 371 h | -0.69097433008164  | 23.67173430980921 | -12.61436414691627 | 372 h | 8.62250945629585   | 22.72934651079285  | -8.05958555162615  |
| 373 h | 6.55614185403580   | 20.31736674748023 | -6.95245170395338  | 374 c | 10.43071720388554  | 19.05759882447839  | -7.54696342087725  |
| 375 c | -2.58685949203373  | 18.74352907960922 | 9.18117174480254   | 376 h | -4.24253082032923  | 15.89894856770894  | 6.73643274891358   |
| 377 h | -                  |                   |                    |       |                    |                    |                    |

|       |                    |                   |                    |       |                    |                   |                    |
|-------|--------------------|-------------------|--------------------|-------|--------------------|-------------------|--------------------|
| 397 h | 17.95840644466239  | 45.91176821548618 | 0.01644847953121   | 398 h | 14.83062456001531  | 46.84008045366988 | -0.91664534917414  |
| 399 h | 11.50595998126052  | 36.47575421767633 | 17.70212451903569  | 400 h | 9.37221367108234   | 38.18924941569087 | 15.69566577396373  |
| 401 h | 8.24195251957237   | 36.79451858077746 | 18.57438014109533  | 402 h | -13.35082231127735 | 26.36898109874454 | -3.52240277909205  |
| 403 h | -16.45854083911046 | 27.28901828402988 | -4.42848724845930  | 404 c | -16.21812807370533 | 25.80835432226637 | -0.60290747452683  |
| 405 c | 6.18612180762971   | 25.68912002666497 | -17.72488131939226 | 406 h | 7.02459406984913   | 27.67326733870020 | -14.20603583088806 |
| 407 h | 5.66611372062729   | 29.61299706293527 | -16.59325162353463 | 408 h | 10.09568108659767  | 18.41321757094648 | -9.52004347193889  |
| 409 h | 12.40050793909129  | 19.79170394587409 | -7.44843947916950  | 410 h | 10.32698589085459  | 17.36421869842272 | -6.30038360434453  |
| 411 h | -1.65641526251461  | 17.31403220403712 | 10.40974261130762  | 412 h | -1.32394484474581  | 20.42327890068624 | 9.12276498903733   |
| 413 h | -4.37280484447816  | 19.32558134913825 | 10.13142573426941  | 414 h | -10.32995965066515 | 38.78775146966379 | -13.84572755024103 |
| 415 h | -9.23142527365838  | 40.15198670083142 | -16.71360143039885 | 416 c | -9.59741769127020  | 36.05810884398235 | -16.84637842624982 |
| 417 h | -10.07553158512676 | 54.17680800343297 | 9.57368513703458   | 418 h | -12.38762405971508 | 52.81528114468842 | 7.49878075873720   |
| 419 h | -10.29545278720585 | 55.22807222771183 | 6.35406653896262   | 420 h | 1.74952934573827   | 55.26663335297190 | -10.34170733443875 |
| 421 h | 1.43136710512012   | 52.14772024023518 | -9.07557655109848  | 422 h | 4.48709535774101   | 53.29157924068971 | -10.01064291831400 |
| 423 h | 15.48236660239762  | 28.02619727789295 | -10.88178458691254 | 424 h | 13.68087937668747  | 30.06524827977400 | -12.90662510089127 |
| 425 h | 12.58969321577658  | 29.40819147316414 | -9.76510127368144  | 426 h | -16.65126069796320 | 23.82743128446637 | -1.15959168864293  |
| 427 h | -18.00635940838578 | 26.67621193946135 | 0.09149168578856   | 428 h | -14.88242074681645 | 25.73158287301699 | 1.02098190136125   |
| 429 h | -11.56205366806631 | 36.09183297235224 | -17.59385998083723 | 430 h | -9.42334260535161  | 34.37741196522173 | -15.59359863332546 |
| 431 h | -8.30269866423987  | 35.76452885387767 | -18.47963967388248 | 432 h | -8.14707749665829  | 46.58875460487862 | 18.58206169778615  |
| 433 h | -6.21832977904782  | 48.83226446205330 | 16.92364251683472  | 434 h | -4.84995206733353  | 46.87759528894389 | 19.33505217857023  |
| 435 h | 8.08337328809565   | 26.01084628801530 | -18.57200857597362 | 436 h | 4.78065729249988   | 25.70198929011383 | -19.29232854429127 |
| 437 h | 6.18526979364069   | 23.75506269584250 | -16.89522802758788 | 438 h | -15.30231880857490 | 37.25203989411919 | 10.50729818347892  |
| 439 h | -16.13056188727075 | 41.40794693551602 | 8.26319308272512   | 440 c | -16.50714387994599 | 42.07365418424819 | 12.3082256349845   |
| 441 h | -13.37651086044364 | 42.70789869052758 | 9.69705873790586   | 442 h | -15.34155025221558 | 42.07307125925556 | 14.06056115724541  |
| 443 h | -17.31333061870735 | 44.00291660884360 | 12.08898899351614  | 444 h | -18.11257054547560 | 40.74717699602702 | 12.61820875178239  |

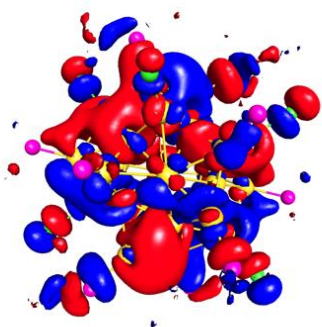

HOMO

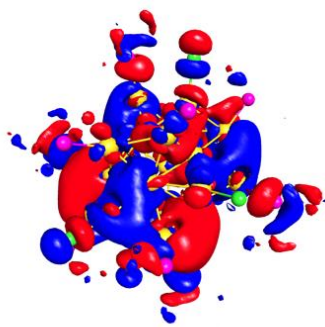

HOMO - 1

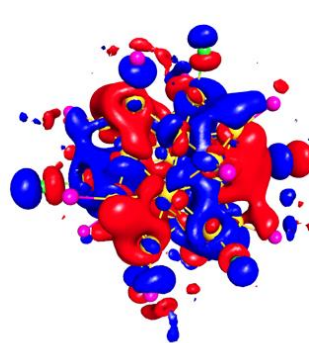

HOMO - 2

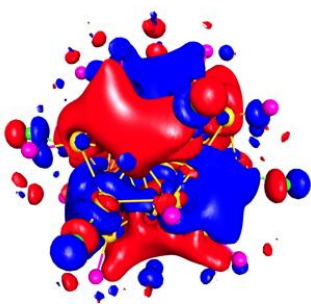

LUMO

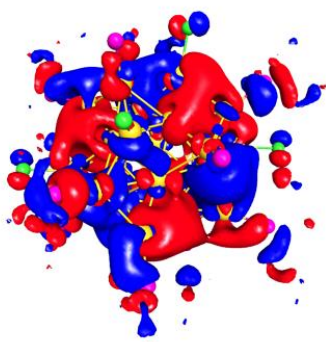

LUMO + 1

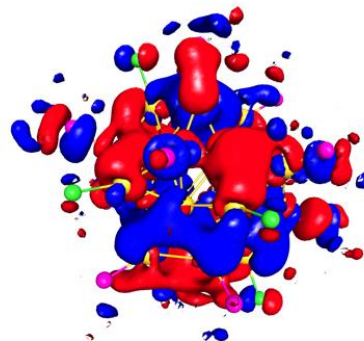

LUMO + 2

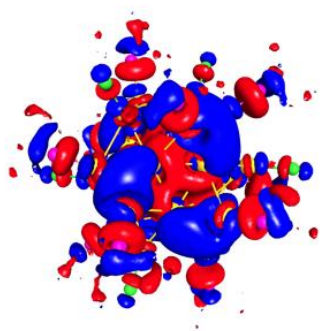

LUMO +3

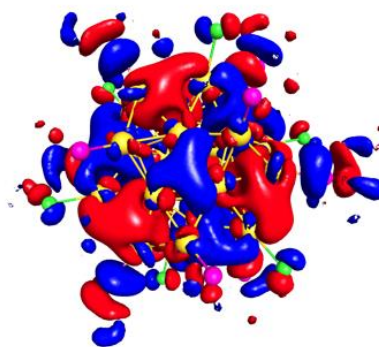

LUMO +4

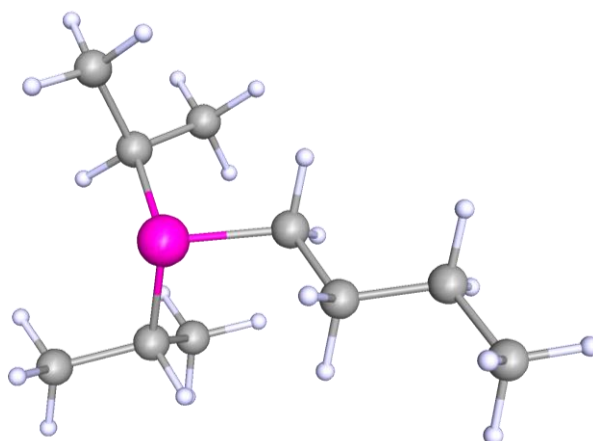

Figure S11: Geometry optimized structure of  $(\text{Pr}_2)\text{BuP}$

Point group:  $C_1$

Energy: -735.87633553543 H

HOMO-LUMO-Gap: 5.571 eV

|      |                   |                    |                   |      |                   |                   |                   |
|------|-------------------|--------------------|-------------------|------|-------------------|-------------------|-------------------|
| 1 p  | 0.11709545658854  | 0.09893755093767   | -0.36154297421865 | 2 c  | -1.59373885260306 | 1.84357203162367  | -3.02554088141821 |
| 3 c  | -1.33739743580592 | 1.46647222534433   | 2.63564235416048  | 4 c  | -1.34113384275355 | -3.14335527742134 | -0.49591757045569 |
| 5 c  | -4.23070305022030 | 1.62544080243955   | 2.81773080735606  | 6 h  | -0.66415098463353 | 0.11119183515303  | 4.10570489949933  |
| 7 c  | -0.09361899380344 | 4.03786378282669   | 3.19892740889408  | 8 h  | -4.81305055724419 | 2.22501734992729  | 4.75261740621893  |
| 9 h  | -5.01243335190364 | 3.04340310933186   | 1.47579385020224  | 10 h | -5.16595391220879 | -0.21693001836069 | 2.43309678713797  |
| 11 h | -0.69284474958636 | 4.76248055108012   | 5.08342802121485  | 12 h | 2.00327171883752  | 3.90020737650377  | 3.18938455740978  |
| 13 h | -0.64290906076145 | 5.49068177020070   | 1.77673306863508  | 14 c | 0.20570208012788  | 2.01577746963504  | -5.31091044528337 |
| 15 h | -1.84444501739771 | 3.79240397023167   | -2.26059163844355 | 16 c | -4.19777651404623 | 0.83736994398349  | -3.83576036212072 |
| 17 h | -4.04979888963780 | -1.07636113976710  | -4.69377643285238 | 18 h | -5.04348181392601 | 2.10086654701301  | -5.29528853617998 |
| 19 h | -5.55680121305985 | 0.71812522237679   | -2.24272388155593 | 20 h | 2.04599237686377  | 2.88192504075105  | -4.78607615100524 |
| 21 h | 0.61372248692464  | 0.10903813163822   | -6.10654456590394 | 22 h | -0.64739422768175 | 3.16906120836513  | -6.85430771468136 |
| 23 h | -1.01588549979581 | -3.83586215929491  | -2.45969289385655 | 24 h | -3.42906678460234 | -3.08564607077327 | -0.22689289734091 |
| 25 c | -0.13242891734768 | -5.00660853176777  | 1.38235942104148  | 26 h | 1.95909384241360  | -5.00087129202240 | 1.12082568676432  |
| 27 h | -0.46443189979385 | -4.34968604836388  | 3.35862884747461  | 28 c | -1.13344817811793 | -7.72486868013517 | 1.11825166988254  |
| 29 h | -0.79136145355114 | -8.39523606060934  | -0.85129887075026 | 30 h | -3.22717653042901 | -7.72089954563605 | 1.36683025561873  |
| 31 c | 0.06268264092922  | -9.58240288270495  | 2.99657182728609  | 32 h | -0.30733151512621 | -9.00475460548516 | 4.98620619047341  |
| 33 h | -0.69950343668362 | -11.52605817996574 | 2.74896107818547  | 34 h | 2.15004635859753  | -9.68231244798381 | 2.74971655229163  |

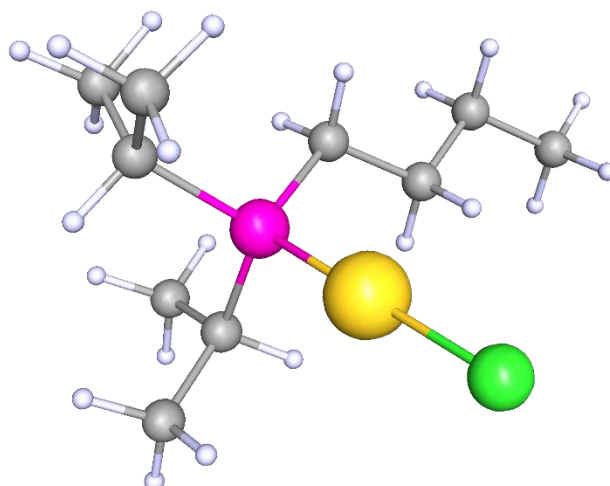

Figure S12: Geometry optimized structure of **1**

Point group:  $C_1$

Energy: -1331.97716043729 H

HOMO-LUMO-Gap: 4.676 eV

|      |                   |                    |                   |      |                   |                   |                   |
|------|-------------------|--------------------|-------------------|------|-------------------|-------------------|-------------------|
| 1 au | 4.36504672798423  | -0.05777069010105  | -0.24847276666808 | 2 p  | 0.03693093003921  | -0.01104715359815 | -0.29951582367987 |
| 3 cl | 8.74857843274661  | -0.14834827420561  | -0.15097830323336 | 4 c  | -1.35635597943654 | 1.83360038660153  | -3.02171036947938 |
| 5 c  | -1.22868742118166 | 1.36742820726181   | 2.73106822925131  | 6 c  | -1.30291429121852 | -3.25262350275089 | -0.54697970714613 |
| 7 c  | -4.11777244665515 | 1.33786556073965   | 3.04140423157467  | 8 h  | -0.38977540514159 | 0.06641853102138  | 4.16096824564868  |
| 9 c  | -0.11217372568904 | 4.01479129649957   | 3.19181217008204  | 10 h | -4.61879385917849 | 1.88971808894176  | 5.00928114991559  |
| 11 h | -5.05281973232939 | 2.71742865378713   | 1.76155951429052  | 12 h | -4.95884394272820 | -0.55587982729388 | 2.69611281943271  |
| 13 h | -0.63174178646528 | 4.68405852445019   | 5.11714114062321  | 14 h | 1.98396765999744  | 4.00752919369615  | 3.04805542862451  |
| 15 h | -0.85590543040733 | 5.42626800031184   | 1.82034625376253  | 16 c | 0.41311364660543  | 1.73400838045194  | -5.33172491847061 |
| 17 h | -1.37822141660167 | 3.81378365276984   | -2.30308756577706 | 18 c | -4.07033363769289 | 1.06847795158887  | -3.74372400762882 |
| 19 h | -4.12779560184807 | -0.85892205843363  | -4.57909831929008 | 20 h | -4.80728168382352 | 2.39438135161106  | -5.20194007021732 |
| 21 h | -5.40161567555404 | 1.11377100764388   | -2.12378573370347 | 22 h | 2.33648439611675  | 2.43890464167283  | -4.87310937082931 |
| 23 h | 0.61545058383357  | -0.22630920415697  | -6.06726918162513 | 24 h | -0.37369468103073 | 2.91607306948204  | -6.88500034329605 |
| 25 h | -0.76607180883078 | -3.93208817526619  | -2.46654406322036 | 26 h | -3.40357081728940 | -3.14908083364587 | -0.50421805966556 |
| 27 c | -0.31598329643194 | -5.10524919353124  | 1.46588868055992  | 28 h | 1.79046460439098  | -5.07303056616779 | 1.46336540124992  |
| 29 h | -0.90828800428950 | -4.46340741963483  | 3.38380272903405  | 30 c | -1.25222257755626 | -7.82712681857165 | 1.04547187423851  |
| 31 h | -0.64218884855401 | -8.47477832695816  | -0.86508149042273 | 32 h | -3.36054088709888 | -7.84469276446631 | 1.01727488357473  |
| 33 c | -0.28997104871103 | -9.68451878667470  | 3.05305389897609  | 34 h | -0.92801792181249 | -9.13037539386404 | 4.97999800009214  |
| 35 h | -0.99025198445125 | -11.63207988731196 | 2.68836116735908  | 36 h | 1.81173715781854  | -9.75767865339673 | 3.08055111609635  |

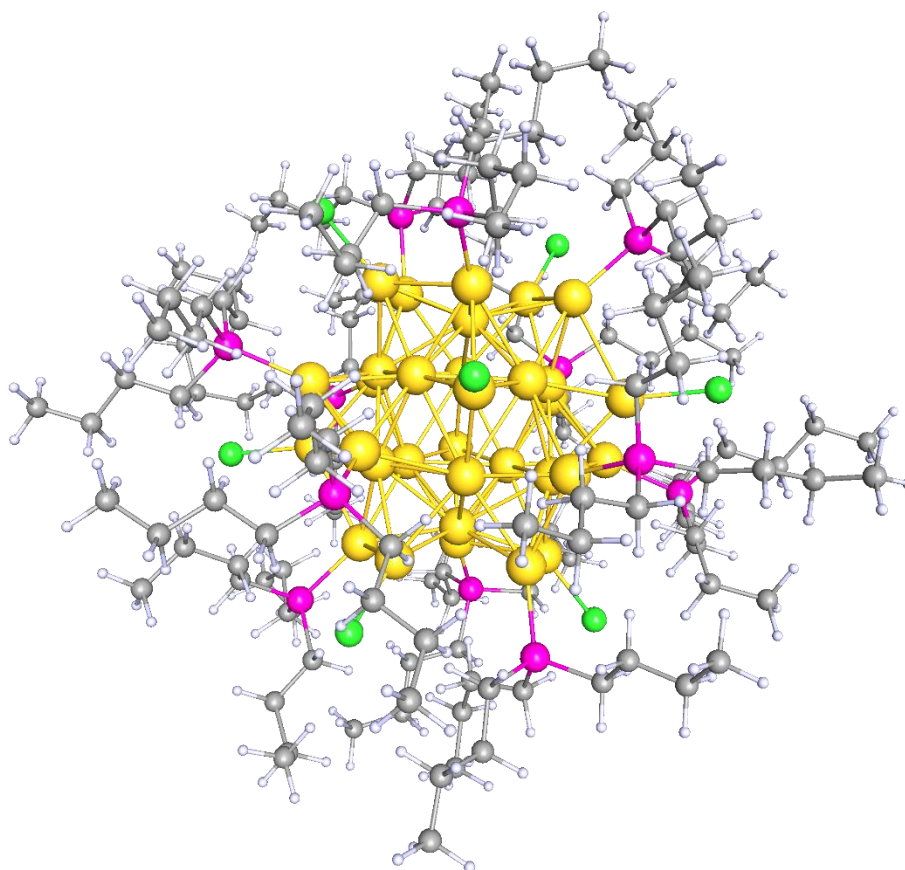

Figure S13: Geometry optimized structure of  $\text{Au}_{32}(\mu^3\text{Bu}_3\text{P})_{12}\text{Cl}_8$

Point group:  $C_1$

Energy: -17788.91558969258 H

HOMO-LUMO-Gap: 0.488 eV

|       |                   |                   |                   |       |                   |                   |                   |
|-------|-------------------|-------------------|-------------------|-------|-------------------|-------------------|-------------------|
| 1 au  | 24.84359628604379 | 26.15887918462396 | 34.37098876549325 | 2 au  | 22.90741216584299 | 27.30086487213529 | 29.21809111963159 |
| 3 au  | 30.43211561043692 | 27.33379746065258 | 34.45174462797550 | 4 au  | 26.87814965104154 | 30.60134050077204 | 31.67760664384629 |
| 5 au  | 28.69004438665984 | 22.11744341911229 | 33.70558821492658 | 6 au  | 24.20961365186486 | 22.10225353555652 | 30.69615769484829 |
| 7 au  | 28.25191950132082 | 24.77134225294482 | 38.46777043494478 | 8 au  | 26.39609028194443 | 30.49667878465694 | 37.07106788050838 |
| 9 au  | 21.89619390425361 | 30.58408612619165 | 33.71503936750112 | 10 au | 19.83153040374952 | 24.72351841899555 | 32.61680699058364 |
| 11 au | 24.02606885574130 | 20.88430978792290 | 36.00941108084707 | 12 au | 25.51628046341471 | 23.70710340191784 | 25.52392444659026 |
| 13 au | 27.23680708646400 | 28.94289769265489 | 26.28131997165319 | 14 au | 23.32391368699229 | 32.35899242744523 | 27.83587583936986 |
| 15 au | 22.59323794249609 | 28.14249276283117 | 23.79285699811080 | 16 au | 20.31602851329224 | 22.95475409658700 | 27.11136284555461 |
| 17 au | 33.02866173852411 | 23.73568234861131 | 30.72382519583113 | 18 au | 31.70351485549106 | 28.93995004322366 | 29.27335858020576 |
| 19 au | 33.32464628430920 | 22.99518038029780 | 36.22378590758296 | 20 au | 35.62362643120551 | 28.11177586842968 | 32.81997913371470 |
| 21 au | 31.73783069214887 | 32.34600402410069 | 33.50030545730390 | 22 au | 29.48207612718574 | 33.63719902523896 | 27.75321482268981 |
| 23 au | 29.06590196124812 | 20.42969591748129 | 28.37197903123621 | 24 au | 32.63452591457634 | 18.71890895186223 | 32.23089009433284 |
| 25 au | 26.44370457083098 | 17.41318286001344 | 32.25327899452071 | 26 au | 24.19656659193159 | 18.70292792196424 | 26.47568585432756 |
| 27 cl | 27.71897594692039 | 24.18549443573717 | 43.02194572948429 | 28 h  | 30.66212276984475 | 18.18037950666137 | 38.51164628887115 |
| 29 p  | 27.60398711754203 | 32.51720358238017 | 40.85442759402095 | 30 p  | 17.91453409884424 | 32.57857287183317 | 33.72468005550137 |
| 31 cl | 15.60517695045670 | 23.93849147314990 | 34.40972651216255 | 32 p  | 21.51889183347637 | 20.02740441410788 | 39.59210867633257 |
| 33 au | 31.06802079174985 | 24.83793894803787 | 25.57579177783750 | 34 au | 27.68391622210336 | 26.27104924338629 | 21.51558974577372 |
| 35 au | 29.44611107900882 | 20.37908892691611 | 23.01804377180042 | 36 au | 31.88826206031484 | 30.16938418681492 | 23.96688789891065 |
| 37 cl | 21.21432767387487 | 36.49256953281525 | 27.35522069658342 | 38 p  | 20.61868553753359 | 30.16849909449699 | 20.35971968509672 |
| 39 p  | 16.41810718119904 | 21.13631441748317 | 26.07491396499517 | 40 au | 33.97772893161076 | 20.30423341088843 | 26.27614042708151 |
| 41 au | 36.04751941494447 | 26.32898400433491 | 27.28891716875439 | 42 p  | 35.39034555818842 | 20.99451690917530 | 39.61598212254933 |
| 43 p  | 39.57658026748975 | 29.90343372187238 | 33.70014460374691 | 44 cl | 33.33987517536425 | 36.46134125771924 | 34.98951933014622 |
| 45 p  | 29.14599928784045 | 38.04867112723255 | 28.39423844662974 | 46 cl | 34.81225324892696 | 14.71651107182054 | 33.24724928937770 |
| 47 p  | 26.75497921855875 | 12.99722839616626 | 31.64043938817599 | 48 cl | 22.46910041964256 | 14.58814954203908 | 25.10384407756767 |
| 49 c  | 31.22718500361474 | 17.47609417191100 | 40.41583518346196 | 50 c  | 28.38891956974360 | 35.89192192828344 | 40.29374871747289 |
| 51 c  | 30.37181926378399 | 31.13747833858790 | 42.49106042922037 | 52 c  | 25.24508744499771 | 32.46600136353719 | 43.45914219746565 |
| 53 c  | 15.74626499135082 | 31.04616586353036 | 36.01794367483126 | 54 c  | 18.10131704719860 | 35.97428743241208 | 34.58895961340652 |
| 55 c  | 16.26856030267309 | 32.50593932433110 | 30.61332028039833 | 56 h  | 15.86353188771755 | 28.98513924762376 | 35.58387079830221 |
| 57 c  | 22.88335836633757 | 17.70937543353568 | 41.84781651648906 | 58 c  | 20.95816492371438 | 22.76048344879147 | 41.69923589646994 |
| 59 c  | 18.36550737818798 | 18.8189832141603  | 38.65469739486685 | 60 cl | 28.04102147723050 | 26.89252439368226 | 16.94468185921367 |
| 61 h  | 25.47800867807077 | 32.77894052768756 | 21.49584270724170 | 62 p  | 28.40188757579645 | 18.28244295170218 | 19.23064267309219 |
| 63 p  | 34.36705098525212 | 31.02886624997692 | 20.35788947887599 | 64 c  | 23.04959023559669 | 31.71610379201433 | 18.35110203736200 |

|       |                   |                   |                   |       |                   |                    |                   |
|-------|-------------------|-------------------|-------------------|-------|-------------------|--------------------|-------------------|
| 65 c  | 18.2526932393849  | 32.56448853782730 | 21.36819934447016 | 66 c  | 18.97787990296106 | 28.23325032358685  | 17.92784932721822 |
| 67 c  | 13.76029837091269 | 23.27816588284947 | 25.25081421360205 | 68 c  | 16.69387603464125 | 18.88889217950718  | 23.39386370846117 |
| 69 c  | 15.15260531447918 | 19.31656450295003 | 28.78159860819956 | 70 p  | 38.06343909634889 | 18.55604234430562  | 25.96372262558812 |
| 71 cl | 40.27297126161003 | 27.14010470575180 | 25.47670034765162 | 72 c  | 33.01277323086813 | 19.40746803899631  | 41.65887688495654 |
| 73 c  | 37.80250313471957 | 18.65961409816731 | 38.58935013896277 | 74 c  | 37.00742291008228 | 22.99804190058000  | 42.00935824128469 |
| 75 c  | 42.20934666632738 | 27.73222062360920 | 34.53282822719756 | 76 c  | 39.43518005765544 | 32.26108637992164  | 36.29494040398811 |
| 77 c  | 40.80966262244625 | 31.61494502234599 | 30.91254110350193 | 78 c  | 32.17792076376156 | 39.80350027949840  | 28.57029761210301 |
| 79 c  | 27.26984965697547 | 39.54381271401916 | 25.83810680193858 | 80 c  | 27.42729706703821 | 38.74110025094112  | 31.38552324056963 |
| 81 c  | 23.72222213882472 | 11.23481083882175 | 31.62273052694727 | 82 c  | 28.75602450525148 | 11.53177425537011  | 34.11602096768284 |
| 83 c  | 28.29161965215469 | 12.28633848322148 | 28.55321096596805 | 84 h  | 29.45411096826848 | 17.46386562792626  | 41.55475837360327 |
| 85 c  | 32.20572041449127 | 14.74774689091039 | 40.19279799339620 | 86 h  | 29.71079846671766 | 35.90930903548335  | 38.65163619819373 |
| 87 h  | 26.61322337210152 | 36.78765331041902 | 39.60024860458524 | 88 c  | 29.51553881878372 | 37.39459286397300  | 42.50472036513987 |
| 89 h  | 30.59557522254964 | 32.22431663344920 | 44.28087357698844 | 90 h  | 29.80562719835580 | 29.17513509377381  | 43.01590701791762 |
| 91 c  | 32.83273066577953 | 31.10272314015952 | 40.96290681020970 | 92 h  | 24.99756829924559 | 30.42944101190105  | 43.93588090782083 |
| 93 h  | 26.15188410679932 | 33.37543454823369 | 45.13055613970513 | 94 c  | 22.69062236798316 | 33.70543091177906  | 42.89295671405397 |
| 95 h  | 16.65635852376132 | 31.29324974834500 | 37.89815792725480 | 96 c  | 12.96756709929520 | 31.88671173591075  | 36.05812584479705 |
| 97 h  | 16.14698220359217 | 36.74910704698521 | 34.61818155974154 | 98 c  | 19.47343535150083 | 36.47160462963523  | 37.09409470728930 |
| 99 h  | 17.79537301068826 | 32.43607665378934 | 29.16958717125948 | 100 h | 15.27622816183171 | 30.64881857350727  | 30.54520369889821 |
| 101 c | 14.48113985809044 | 34.71941386723343 | 30.02612021409106 | 102 h | 24.65394873789207 | 18.61346480058255  | 42.54406388122604 |
| 103 h | 21.57383141922553 | 17.58840186054571 | 43.49496697705160 | 104 c | 23.41886192775653 | 15.07017428023999  | 40.78117732226659 |
| 105 h | 19.79689893547359 | 22.04671456699119 | 43.30471122448996 | 106 h | 22.85657340857690 | 23.26835423224699  | 42.46678084613621 |
| 107 c | 19.73295055253927 | 25.06262137341918 | 40.43846431743533 | 108 h | 17.61538334845011 | 20.23049526657483  | 37.27898076593932 |
| 109 h | 18.72156827928345 | 17.06880759868375 | 37.53996318723463 | 110 c | 16.42935486269166 | 18.33171691957965  | 40.75844040779656 |
| 111 c | 24.89353049862618 | 33.56489256466637 | 19.62976172184842 | 112 c | 27.20719027759097 | 15.03189277692059  | 19.7969942922758  |
| 113 c | 25.97131119515857 | 19.87266190125091 | 17.28596022661702 | 114 c | 31.04947293051774 | 17.91792636653735  | 16.94962944869635 |
| 115 c | 33.05784164360335 | 33.44729735312735 | 18.17345576453814 | 116 c | 34.76867569980478 | 28.32402001505701  | 18.17845986689630 |
| 117 c | 37.58046147279425 | 32.11018465368466 | 21.24110553655422 | 118 h | 24.15105994750647 | 30.08419491855372  | 17.59371788067927 |
| 119 h | 22.06910828556264 | 32.60149135000085 | 16.71149928050654 | 120 h | 16.82879702967350 | 31.51004468934551  | 22.50818555414390 |
| 121 h | 19.25025992190831 | 33.80353167095976 | 22.74529588022157 | 122 c | 16.95081754512813 | 34.07774647529362  | 19.25821719298822 |
| 123 h | 18.46719597556571 | 29.54452745926803 | 16.35931107912486 | 124 h | 20.43718613447061 | 26.92402572534517  | 17.16784627443597 |
| 125 c | 16.64628724847004 | 26.75216846688427 | 18.79762605942892 | 126 h | 14.11528983147803 | 23.96163390544551  | 23.29451659340711 |
| 127 h | 12.01633861598045 | 22.09539525710174 | 25.18148756373640 | 128 c | 13.40663176654730 | 25.49683961217465  | 27.09279843758948 |
| 129 h | 17.47553813672507 | 20.01556847349470 | 21.79414485576476 | 130 h | 18.22875560222222 | 17.55574008138975  | 23.94733583484372 |
| 131 c | 14.28834871502486 | 17.48597263420740 | 22.56853813413739 | 132 h | 14.68166054039890 | 20.73739642824487  | 30.26565910424159 |
| 133 h | 13.35149930190676 | 18.42904365511306 | 28.14575394895185 | 134 c | 16.99034812856748 | 17.36419781080657  | 29.88684459046963 |
| 135 c | 39.97275278793951 | 20.37860157791950 | 23.65859442630114 | 136 c | 38.16297800138058 | 15.21908774505960  | 24.86695152528929 |
| 137 c | 39.65825013654793 | 18.57376712017266 | 29.08834726690743 | 138 h | 40.04756618970514 | 22.33948848375518  | 24.43260166100686 |
| 139 h | 31.86481632172874 | 21.01755674715937 | 42.39163556447973 | 140 h | 34.02446156096529 | 18.5815456774923   | 43.31065631092254 |
| 141 h | 39.14651073790213 | 19.73758823280961 | 37.37649576626224 | 142 h | 36.80688178639713 | 17.35427119338126  | 37.27090456611430 |
| 143 c | 39.23658630079230 | 17.24588113647882 | 40.68229100699364 | 144 h | 37.55584263758579 | 21.72199701821149  | 43.59427814636274 |
| 145 h | 35.30317253353237 | 24.29315260315772 | 42.76106367056237 | 146 c | 39.30552126656710 | 24.50207533047048  | 41.08959770247251 |
| 147 h | 41.91719972338512 | 27.16252566123990 | 36.53558138950337 | 148 h | 43.98596912376210 | 28.86530281491396  | 34.46856265796379 |
| 149 c | 42.42291376842869 | 25.40986099947094 | 32.79963881674804 | 150 h | 38.73487081259631 | 31.20739936730842  | 37.97762403030465 |
| 151 h | 37.87629660256709 | 33.57618623933804 | 35.76882645056790 | 152 c | 41.88393843464398 | 33.68522342794671  | 36.93639444089308 |
| 153 h | 41.18860448488508 | 30.15794062535750 | 29.43677552388953 | 154 h | 42.65616831099540 | 32.45549519702087  | 31.47711793455053 |
| 155 c | 39.00077175980619 | 33.60971705995103 | 29.83520930303489 | 156 h | 33.21620843422884 | 38.98440182115544  | 30.20994695551446 |
| 157 h | 31.73861605314041 | 41.80382204271621 | 29.05563449693960 | 158 c | 33.76596800458023 | 39.68707355501308  | 26.14721341199159 |
| 159 h | 25.49110884687457 | 38.41636005255414 | 25.77415573203880 | 160 h | 28.30443472652786 | 39.13802168527355  | 24.05071643777508 |
| 161 c | 26.63214111627894 | 42.36598879864446 | 26.04011310093719 | 162 h | 27.86688869641367 | 37.14237444762243  | 32.67698855091496 |
| 163 h | 25.39021835551784 | 38.56300765016650 | 30.87687242961044 | 164 c | 28.00617278023791 | 41.25789875124114  | 37.12132150692509 |
| 165 h | 22.64083830420109 | 19.98478565086982 | 29.97805356148989 | 166 h | 24.15382968774398 | 9.21589715337053   | 31.2119167904769  |
| 167 c | 22.18856351155556 | 11.45337575907853 | 34.07316650793341 | 168 h | 30.49194304329719 | 12.72572514269566  | 34.17441218709936 |
| 169 h | 27.74790288387201 | 11.86113511914900 | 35.93481830927266 | 170 c | 29.50436003104932 | 8.74282700928327   | 33.84126996206540 |
| 171 h | 27.17281906219667 | 13.85370091744692 | 27.27418343917565 | 172 h | 30.35616395695810 | 12.51479728867400  | 28.90640027308123 |
| 173 c | 27.67063380996752 | 9.73991933288124  | 27.30302097650941 | 174 c | 32.67414810902893 | 13.40439887636040  | 42.71651615205308 |
| 175 h | 30.77938414716899 | 13.65318015559478 | 39.10166565929144 | 176 h | 33.93932846297248 | 14.68481505197690  | 39.00688170584041 |
| 177 h | 28.20062686217117 | 37.39338471842107 | 44.15471456414453 | 178 h | 31.28910086333608 | 36.46714256762181  | 43.16032652402341 |
| 179 c | 30.12986893865768 | 40.13739494087395 | 41.76693918552930 | 180 h | 32.60894901189529 | 29.75590465919642  | 39.35886825816205 |
| 181 h | 33.20951999890100 | 32.97821060359453 | 40.08176255281016 | 182 c | 35.12420551771134 | 30.33255514589092  | 42.57767534710971 |
| 183 h | 22.97027580251474 | 35.68469916862642 | 42.22667012717162 | 184 h | 21.76308843838868 | 32.681925577773149 | 41.30500346346559 |
| 185 c | 20.93656826598534 | 33.73977154330876 | 45.20886972641493 | 186 h | 12.13422276596896 | 31.57640540472657  | 34.15243175551814 |
| 187 h | 12.81745846719530 | 33.95370749571129 | 36.44879092691301 | 188 c | 11.36060270869462 | 30.42335379580456  | 37.99824428618184 |
| 189 c | 19.61773959190971 | 39.28528921887850 | 37.81982022373221 | 190 h | 21.42146747895334 | 35.68348251578103  | 36.95698614723317 |
| 191 h | 18.53001252376977 | 35.41814652772193 | 38.65616594566335 | 192 c | 13.02393635930320 | 34.3510662329087   | 27.54540830147222 |
| 193 h | 13.09893136944622 | 35.01282738062910 | 31.58748464093932 | 194 h | 15.61940955213974 | 36.48106582336250  | 29.87717748708454 |
| 195 h | 21.64910553046576 | 14.23591917827621 | 39.99741310681264 | 196 h | 24.75609544379528 | 15.23150759058553  | 39.15975554052886 |
| 197 c | 24.50217901111712 | 13.26879022538927 | 42.78668295003754 | 198 h | 17.92625745299652 | 24.53747571910684  | 39.49361482002821 |
| 199 h | 20.9923883576060  | 25.74558627475694 | 38.89936437314581 | 200 c | 19.24920056908581 | 27.23918513661076  | 42.30234132114537 |
| 201 h | 17.16537098137595 | 16.91036835559251 | 42.13160529162901 | 202 h | 16.10693832712082 | 20.10130267895620  | 41.85439714556468 |
| 203 c | 13.87917226283731 | 17.41733697453428 | 39.70621420744694 | 204 h | 26.64667431720776 | 33.58178556587315  | 18.46069051510749 |
| 205 c | 23.98175116439430 | 36.30408684984961 | 19.96768425897562 | 206 h | 25.84537856704344 | 15.16460318441754  | 21.40027024241556 |
| 207 h | 28.85067645765315 | 13.94922860185868 | 20.5453359136078  | 208 c | 25.98525996309582 | 13.64610961067368  | 17.55973139690492 |
| 209 h | 25.76090020586610 | 18.74040381069339 | 15.52349529240014 | 210 h | 26.77088493619639 | 21.74938568101379  | 16.75087629266753 |
| 211 c | 23.43328806187561 | 20.23082050378425 | 18.64204438789818 | 212 h | 31.51482878459107 | 19.86554311779043  | 16.30302958385402 |
| 213 h | 30.30844565757083 | 16.87656597560498 | 15.27351746092125 | 214 c | 33.41657869806215 | 16.61594058942834  | 18.00032694948764 |
| 215 h | 31.23218839807226 | 32.64210905035000 | 17.49999110345605 | 216 h | 34.33547295920217 | 33.53498883301749  | 16.49944078538742 |
| 217 c | 32.67033478194067 | 36.09184229391621 | 19.28987028491280 | 218 h | 35.98113133280065 | 28.99913991102521  | 16.59421512119365 |
| 219 h | 32.84380133841852 | 27.95864936253692 | 17.39532166231465 | 220 c | 35.82067282684841 | 25.90426755735203  | 19.37426252951179 |
| 221 h | 38.31336687479515 | 30.66060720524596 | 22.58613229613112 | 222 h | 37.30837710134577 | 33.85823610870231  | 22.38217844339837 |
| 223 c | 39.48683664412049 | 32.55730199640928 | 19.10139773158816 | 224 h | 15.85440176443202 | 32.76248477065098  | 18.03331546496480 |

|       |                    |                    |                   |       |                    |                   |                   |
|-------|--------------------|--------------------|-------------------|-------|--------------------|-------------------|-------------------|
| 247 h | 40.29482558582790  | 18.63077570737185  | 41.86337387298769 | 248 h | 37.87380871184813  | 16.29106474438979 | 41.97415222445949 |
| 249 c | 41.121196515482538 | 15.26275090992028  | 39.67933950234204 | 250 h | 40.65577290214873  | 23.23510477199429 | 40.0838506033418  |
| 251 h | 38.67190917557097  | 25.92429028670158  | 39.67090907415688 | 252 c | 40.70596252680595  | 25.81450761037132 | 43.27294555312665 |
| 253 c | 44.89405093183050  | 23.91668237082482  | 33.15460689522314 | 254 h | 42.28099058734126  | 25.99372530711462 | 30.78301027231866 |
| 255 h | 40.76406654057813  | 24.15527672311379  | 33.13882173884907 | 256 h | 43.37656986825009  | 32.30655249843891 | 37.48851453703271 |
| 257 h | 42.60480172115052  | 34.68706467500253  | 35.22900315256089 | 258 c | 41.56504850811000  | 35.62467299717783 | 39.08770362921783 |
| 259 h | 38.41079164956836  | 34.98182762501469  | 31.32124083753412 | 260 h | 37.23793233056367  | 32.63867308851813 | 29.21637311985353 |
| 261 c | 40.13900166550310  | 35.04881202034970  | 27.58096783705930 | 262 h | 32.63846421723177  | 40.38277773168731 | 24.50825047436021 |
| 263 h | 34.23753504754472  | 37.67771826730703  | 25.71783199204480 | 264 c | 36.20321955335017  | 41.25819749196187 | 26.32570301593547 |
| 265 h | 25.54745263217730  | 42.71435898210964  | 27.81047443904579 | 266 h | 28.38888977608001  | 43.52415898408695 | 26.17746327648027 |
| 267 c | 25.04120533753233  | 43.29104552120927  | 23.79124854971226 | 268 h | 29.98297333299679  | 41.20791188789239 | 33.43029661556837 |
| 269 h | 27.88526175921896  | 42.87088570083748  | 31.36447225866355 | 270 c | 26.20703238297161  | 41.76755637937939 | 34.93168304189513 |
| 271 h | 23.36269678613135  | 10.86483491647688  | 35.72108702540852 | 272 h | 21.69380079849379  | 13.47528265239776 | 34.40545707750088 |
| 273 c | 19.77640544512481  | 9.83455337768118   | 34.02903026188317 | 274 h | 30.58487493258157  | 8.48337419166330  | 32.05282397591345 |
| 275 h | 27.79754040649596  | 7.51341993024162   | 33.69399257886877 | 276 c | 31.15962769417702  | 7.83726373637616  | 36.05205231371050 |
| 277 h | 25.61922994764893  | 9.69300470505057   | 26.84238155444589 | 278 h | 28.04078013424104  | 8.14070244202621  | 28.62138564545223 |
| 279 c | 29.17009972939399  | 9.31024797889074   | 24.85473098472563 | 280 h | 33.28012638662559  | 11.41455627158415 | 42.40673043949172 |
| 281 h | 30.93259001776999  | 13.36218575289533  | 43.89978499585364 | 282 h | 34.17895671746711  | 14.33230213060271 | 43.85834045910286 |
| 283 h | 31.39253611173100  | 40.11094445139791  | 40.08141430528082 | 284 h | 28.360989179091145 | 41.10261390965523 | 41.15024512690434 |
| 285 c | 31.36651133563768  | 41.64773995919361  | 43.90359475035420 | 286 h | 36.71736371173346  | 29.87137897822837 | 41.28239422181668 |
| 287 h | 34.67317827679329  | 28.54683330317088  | 43.60150767393265 | 288 c | 36.013613151613740 | 32.34211181218286 | 44.46648182931097 |
| 289 h | 21.88047732293229  | 34.79868241746006  | 46.76836977006764 | 290 h | 20.69363299054741  | 31.77059430874673 | 45.91625052719422 |
| 291 c | 18.33822646411905  | 34.90367326831232  | 44.68703384957019 | 292 h | 9.33410766153213   | 30.87534330501422 | 37.64606610289057 |
| 293 h | 11.57727005214502  | 28.36101038142613  | 37.62761288877275 | 294 c | 11.98130338053846  | 30.99810906422704 | 30.76792976926027 |
| 295 h | 20.54344245066926  | 40.35110213442653  | 36.25647738193607 | 296 h | 20.90544367196712  | 39.46666549225558 | 39.47797961669645 |
| 297 c | 17.07429415369510  | 40.51116113567890  | 38.46823544952757 | 298 h | 14.40642153025019  | 34.01056528530365 | 25.99357512242614 |
| 299 h | 11.84981281783532  | 32.60763856315227  | 27.68017078282884 | 300 c | 11.33881938035609  | 36.60523656468009 | 26.87041277654370 |
| 301 h | 26.8009118800754   | 14.09421282533936  | 43.56089944632488 | 302 h | 23.16275508654705  | 13.16467197751538 | 44.41114451997851 |
| 303 c | 25.02388566034094  | 10.59886621796952  | 41.79984699453519 | 304 h | 21.06782385471662  | 27.76344902356124 | 43.22828521069895 |
| 305 h | 18.65811479971195  | 28.92499883909481  | 41.18655681066994 | 306 c | 17.24492024624262  | 26.69684893763636 | 42.32393192321969 |
| 307 h | 13.17413874314616  | 18.84347851375953  | 38.32605345147028 | 308 h | 14.18244212351558  | 15.64469852895573 | 38.6049626712008  |
| 309 c | 11.88990074838058  | 16.96055713883338  | 41.75797527040376 | 310 c | 23.52176285347659  | 37.75675231426845 | 17.50360793083357 |
| 311 h | 25.44441161827665  | 37.32218685865176  | 21.08173351201038 | 312 h | 22.25955163177769  | 36.36363308459415 | 21.17171412895688 |
| 313 h | 27.31281711625940  | 13.53737891513770  | 15.92424156128925 | 314 h | 24.31195108205102  | 14.73377167767442 | 16.88771658240303 |
| 315 c | 25.11346655926599  | 10.96555477283473  | 18.26877414576590 | 316 h | 23.72308449879410  | 21.55110869684707 | 20.25802135589193 |
| 317 h | 22.77100773837116  | 18.42010960579071  | 19.49262904129745 | 318 c | 21.36016486375473  | 21.28293514948517 | 16.89897946722336 |
| 319 h | 32.91655081413008  | 14.72071758631438  | 18.77593410239839 | 320 h | 34.14678732974411  | 17.73481904031503 | 19.63032531991352 |
| 321 c | 35.49651528277432  | 16.29282986117940  | 15.99823694124648 | 322 h | 34.48682796340638  | 36.81972506212846 | 20.07289834813053 |
| 323 h | 31.33913172309541  | 35.97349390911941  | 20.91990845562365 | 324 c | 31.66968983845178  | 37.98018168703521 | 17.32135759951428 |
| 325 h | 37.68118529161821  | 26.26062568053759  | 20.29479337663081 | 326 h | 34.52376475594580  | 25.29848201492593 | 20.92081000559169 |
| 327 c | 36.07602377687616  | 23.7356446772304   | 17.45440178895626 | 328 h | 38.76375637282398  | 34.0041020923135  | 17.47491895193212 |
| 329 h | 39.74057776787470  | 30.78492613288088  | 17.99196644587894 | 330 c | 42.08108273292994  | 33.39894953241291 | 20.10584434395410 |
| 331 h | 14.06310276791607  | 36.88196560301066  | 18.56753025660999 | 332 h | 13.72169780600288  | 35.28804528286995 | 21.50552760937831 |
| 333 c | 16.44550930726776  | 38.7625513481451   | 21.55365011991670 | 334 h | 16.61987614010219  | 24.31655210618632 | 15.48584738228597 |
| 335 h | 14.61517340715941  | 27.00214846091437  | 15.24377757643128 | 336 c | 12.990662702849907 | 23.87712985387249 | 17.35703169209997 |
| 337 h | 10.76050476642188  | 28.39313608805870  | 28.21758686504534 | 338 h | 9.29608727160999   | 25.62599453476274 | 27.00725018754294 |
| 339 c | 10.63060524456069  | 28.23117619427454  | 24.12107880571754 | 340 h | 12.85291887846843  | 15.03950274839104 | 19.61790868255527 |
| 341 h | 15.66757290767591  | 16.67666501453123  | 18.77888404739938 | 342 c | 16.27952588232852  | 13.28555880230332 | 21.03939152294546 |
| 343 h | 15.21924500173444  | 17.32776411137916  | 33.58785575861669 | 344 h | 17.43508655915979  | 14.85274903186638 | 33.06509440143303 |
| 345 c | 13.72436346030059  | 14.09838509341549  | 31.51040733433971 | 346 h | 43.83690166807084  | 19.30984356727918 | 24.64882699363537 |
| 347 h | 42.55662527243576  | 17.54742885974379  | 22.07826637690307 | 348 c | 43.91070455881353  | 21.29674434437390 | 21.06266758680307 |
| 349 h | 37.92644425642877  | 13.45412718538386  | 28.58432921945393 | 350 h | 34.97433738073877  | 13.86234915677303 | 27.08608327181643 |
| 351 c | 37.10771688469355  | 10.57945323128225  | 25.78312235359032 | 352 c | 42.81193200201875  | 16.61728370218894 | 32.16443168810967 |
| 353 h | 43.76423295647599  | 18.44445645603756  | 28.60157748536843 | 354 h | 42.2689608899467   | 15.44840917439960 | 28.28374437884889 |
| 355 h | 42.34675774089277  | 14.65965577885768  | 41.28288139324387 | 356 h | 42.40783930816474  | 16.18620557902548 | 38.28652072160385 |
| 357 c | 39.90353152719307  | 12.92266860829668  | 38.48243609963620 | 358 h | 39.34260633521762  | 26.99993338619660 | 44.35491521105520 |
| 359 h | 41.38338598247378  | 24.26335853483868  | 44.62154609524259 | 360 c | 42.94231553687521  | 27.46087668914019 | 42.42881647783032 |
| 361 h | 44.90924307396272  | 22.34632037174459  | 31.75156946988053 | 362 h | 46.52444183253102  | 25.15157053958936 | 32.64277027464717 |
| 363 c | 45.3182548060388   | 22.82947496758046  | 35.80640444311607 | 364 h | 43.48275918702106  | 36.26415753123282 | 39.67954969947322 |
| 365 h | 40.73938622211082  | 34.653406474356195 | 40.7683192123241  | 366 c | 39.95942350498467  | 37.93735708226786 | 38.40455779986466 |
| 367 h | 40.78931250582186  | 33.65485092510434  | 26.14400674385316 | 368 h | 38.59260736748580  | 36.14631368435523 | 26.66950616757481 |
| 369 c | 42.30145205462244  | 36.85673884507175  | 28.25049304676345 | 370 h | 35.70559536387017  | 43.24076765834709 | 26.84021604021330 |
| 371 h | 37.38073828335317  | 40.53237683841049  | 27.91422041418641 | 372 c | 37.75285019366425  | 41.26414370685092 | 23.87994932955837 |
| 373 h | 23.29134599418653  | 42.12352272207531  | 23.68350876859060 | 374 h | 26.09516658400555  | 42.92846703052522 | 22.00088081412511 |
| 375 c | 24.34381098564334  | 46.09504006280201  | 32.95713598146429 | 376 h | 26.30084572450835  | 40.14639148717688 | 36.27455203800947 |
| 377 h | 24.22502750189676  | 41.81290201122253  | 34.21633697258522 | 378 c | 26.79172899125870  | 44.23011855810598 | 36.33495090822140 |
| 379 h | 20.30466907350628  | 7.82809010226766   | 33.65773251893290 | 380 h | 18.57518604829008  | 10.42180105162848 | 32.40031747970357 |
| 381 c | 18.23963873098008  | 9.98424974444725   | 36.47794883453603 | 382 h | 32.84769372344446  | 0.90907823399598  | 36.17829867562899 |
| 383 h | 30.10340213449503  | 8.09520947570013   | 37.85930247174534 | 384 c | 31.99771710170999  | 5.07872876358839  | 35.79896521724068 |
| 385 h | 28.76729479993721  | 10.89895822685552  | 23.53413255008749 | 386 h | 31.23318500389829  | 9.39850324875139  | 25.26983779274604 |
| 387 c | 28.54497772603640  | 6.79358733102222   | 23.56922665425944 | 388 h | 31.77933874801924  | 43.62051436345114 | 43.30716571218053 |
| 389 h | 30.12435168070505  | 41.74388413910066  | 45.60016905827392 | 390 h | 33.18479570286992  | 40.77401005625705 | 44.50272211230389 |
| 391 h | 37.70044991179309  | 31.68802710639999  | 45.53954271750036 | 392 h | 36.53953398147203  | 34.12480482495506 | 43.47843159104804 |
| 393 h | 34.53080897562118  | 32.81683767081851  | 45.88062454360794 | 394 h | 17.15249675267822  | 34.93748375782853 | 46.42219741946357 |
| 395 h | 18.50631713061897  | 36.88382179340644  | 43.99363571395139 | 396 h | 17.28685729644448  | 33.81173912195175 | 43.22748457399122 |
| 397 h | 10.69047402457746  | 29.96075951293536  | 42.06252047837407 | 398 h | 13.94132552201521  | 30.43527672952584 | 41.27831263525501 |
| 399 h | 11.88076821501672  | 33.05207397336876  | 41.18609179280335 | 400 h | 17.32555656977824  | 42.51219367660209 | 39.06088140794670 |
| 401 h | 15.75451700660327  | 40.51257181983642  | 36.83121435642936 | 402 h | 16.12296148475182  | 39.49608323430790 | 40.04875625609524 |
| 403 h | 10.28754498730892  | 36.27124236206392  | 25.08042306346342 | 404 h | 9.91951380838858   | 36.98021234970171 | 28.37863653832427 |
| 405 h | 12.4775363635097   | 38.35623918899891  | 26.62076262492160 | 406 h | 25.78871131287266  | 9.35721904654029  | 4                 |

|       |                   |                   |                   |       |                   |                   |                   |
|-------|-------------------|-------------------|-------------------|-------|-------------------|-------------------|-------------------|
| 429 c | 31.28887281904056 | 40.65671394640441 | 18.35301664075292 | 430 h | 34.21425041779195 | 23.45119192214884 | 16.50874671187869 |
| 431 h | 36.46546835329502 | 21.96254078879514 | 18.52132673576708 | 432 c | 38.14430455656489 | 24.10358088872007 | 15.45865258563471 |
| 433 h | 42.77176621240444 | 31.95253270835277 | 21.47191234167016 | 434 h | 41.84884111031221 | 35.17821299357628 | 21.21340548939680 |
| 435 c | 44.04286722251816 | 33.80196482876371 | 18.01659687086921 | 436 h | 15.03432587247264 | 39.82633729208116 | 22.12458399791549 |
| 437 h | 17.48008556994696 | 37.78976191381242 | 23.28817772309458 | 438 h | 17.83438752754727 | 39.31382116849266 | 20.27937347664106 |
| 439 h | 12.00980713623386 | 23.07482758529040 | 15.6805500068189  | 440 h | 13.58155514542241 | 22.26300597973862 | 18.57093148407243 |
| 441 h | 11.57841381848806 | 24.99990654035880 | 18.44033388633906 | 442 h | 8.85617007243164  | 29.35373120810385 | 24.02130489647798 |
| 443 h | 12.23271046662523 | 29.54666372956576 | 23.75107156773986 | 444 h | 10.57742260606189 | 26.83960394746672 | 22.54480935740967 |
| 445 h | 16.51853015344255 | 12.03583809756340 | 19.36495195256493 | 446 h | 18.19699569772903 | 13.75824977142595 | 21.76165454142220 |
| 447 h | 15.31404135906415 | 12.15928307295206 | 22.53293147364852 | 448 h | 13.08002417756802 | 13.05391827366312 | 33.21861619357491 |
| 449 h | 12.04332132364600 | 15.08963614511154 | 30.72520998477661 | 450 h | 14.34055030535742 | 12.67265870219155 | 30.08862301498413 |
| 451 h | 43.92714661953224 | 23.22586589217991 | 21.90675437232663 | 452 h | 42.72639569829912 | 21.44253352375492 | 19.32403871233105 |
| 453 c | 46.59848343179261 | 20.50089441360862 | 20.34323624707502 | 454 h | 35.92037110923987 | 10.36583200455505 | 24.05292130829485 |
| 455 h | 39.08093002439083 | 10.13785508802643 | 25.18345069089885 | 456 c | 36.27504530245346 | 8.66990463077276  | 27.79572640796621 |
| 457 h | 41.30275203313212 | 15.34975204255574 | 32.90546211142640 | 458 h | 42.68653670924390 | 18.38192831965027 | 33.30761159766137 |
| 459 c | 45.40782214240308 | 15.39735375534374 | 32.54569297549849 | 460 h | 41.37364708748752 | 11.56475230700248 | 37.83732647121440 |
| 461 h | 38.70741822892719 | 13.39918037759593 | 36.82009515300869 | 462 h | 38.68094164538731 | 11.91762989638529 | 39.87070184219144 |
| 463 h | 43.93524135435960 | 28.29219588699623 | 44.07647880003879 | 464 h | 42.31687765994378 | 29.02976754318137 | 41.19213671194311 |
| 465 h | 44.35375242011533 | 26.31900687030553 | 41.34870488022374 | 466 h | 47.04232729666766 | 21.63818472524600 | 35.87625844850786 |
| 467 h | 43.69061729122375 | 21.62383495799693 | 36.40112686067327 | 468 h | 45.53363262498866 | 24.33966611652670 | 37.25347515384954 |
| 469 h | 39.84755464733816 | 39.27476562980423 | 40.02309723527490 | 470 h | 37.99220105378357 | 37.42888204332159 | 37.86286034567268 |
| 471 h | 40.80155199308130 | 38.98180415020720 | 36.78216478506918 | 472 h | 42.96336151660228 | 37.90903631429163 | 26.55401311410165 |
| 473 h | 43.96982148658581 | 35.84479555777723 | 29.03623093993689 | 474 h | 41.69117376460016 | 38.27712952200520 | 29.68041939440276 |
| 475 h | 39.50377294747592 | 42.40908454919098 | 24.08234210768306 | 476 h | 36.64855879862464 | 42.06625404562948 | 22.27741820185387 |
| 477 h | 38.33174247855116 | 39.31622457489144 | 23.32991118651646 | 478 h | 23.19029068662036 | 46.69920483138819 | 22.30711604432070 |
| 479 h | 26.05958030190565 | 47.31270454044464 | 24.01301403987192 | 480 h | 23.22665282093680 | 46.50110749041503 | 25.69334328699848 |
| 481 h | 25.45817673884133 | 44.54127506074206 | 37.93063447855059 | 482 h | 26.64889086467979 | 45.89452813812472 | 35.05459642609716 |
| 483 h | 28.73985696355578 | 44.20874347049820 | 37.12823117926730 | 484 h | 16.52004790882455 | 8.77969493434052  | 36.38032161235254 |
| 485 h | 19.37279886222004 | 9.34393105000878  | 38.13236222834256 | 486 h | 17.60935803381707 | 11.95418871655970 | 36.87166359387721 |
| 487 h | 33.19050263818252 | 4.48604219456122  | 37.42505530811944 | 488 h | 30.34664045050990 | 3.77610253200475  | 35.71374865538736 |
| 489 h | 33.12476662713965 | 4.78354785808225  | 34.04655851956590 | 490 h | 29.64914779553413 | 6.53745606972099  | 21.79830985267014 |
| 491 h | 28.97719692700067 | 5.16219737053231  | 24.82699624710405 | 492 h | 26.50514697944885 | 6.68245656575068  | 23.06709509389934 |
| 493 h | 23.12208789722484 | 7.68142071234550  | 16.69598401546985 | 494 h | 24.90397678419508 | 9.44236595934625  | 14.40607230709751 |
| 495 h | 21.96626289538456 | 10.66918262859278 | 15.58081326310238 | 496 h | 18.86651751226990 | 20.29419306154523 | 13.72955276641290 |
| 497 h | 19.62147985916567 | 17.68808303685574 | 15.77089491337621 | 498 h | 21.91709506212652 | 18.84650772716193 | 13.55478837210436 |
| 499 h | 39.33627767088591 | 14.79564030436831 | 15.49795880004644 | 500 h | 37.51679017436047 | 13.17792687424197 | 17.86242248418412 |
| 501 h | 38.80005836257398 | 16.24993848481294 | 18.51401040112296 | 502 h | 30.58754231781560 | 41.96098869552489 | 16.86168504923037 |
| 503 h | 33.08751967521635 | 41.45260379062626 | 19.10172045919101 | 504 h | 29.88728219104168 | 40.68138726574607 | 19.92277347481213 |
| 505 h | 38.27717826172196 | 22.43650565745518 | 14.18226729470972 | 506 h | 40.02838622934876 | 24.36472246489913 | 16.36165287856909 |
| 507 h | 37.78584073151395 | 25.78165217461530 | 14.24274969480211 | 508 h | 43.42289650523674 | 35.28042626259212 | 16.65279328522331 |
| 509 h | 45.89429876305712 | 34.40521088942680 | 18.80792438501107 | 510 h | 44.36753305568781 | 32.03374696777272 | 16.92301074906478 |
| 511 h | 47.46345344085569 | 21.85612543214284 | 18.98934369754122 | 512 h | 46.62438867047163 | 18.59889567040927 | 19.44197876251340 |
| 513 h | 47.84781201241884 | 20.41219144376341 | 22.03434504763711 | 514 h | 36.31846788601767 | 6.70207061614311  | 27.05762896228509 |
| 515 h | 34.32156134135870 | 9.06644182990198  | 28.46743099050356 | 516 h | 37.52554045784719 | 8.75819454450311  | 29.48401816146198 |
| 517 h | 45.74798470877845 | 14.94062470099102 | 34.56980899159586 | 518 h | 46.95920631189659 | 16.67130910668475 | 31.91184411264431 |
| 519 h | 45.57986708351157 | 13.60544692749720 | 31.45569900795296 | 520 h | 19.11850895576428 | 36.89704311853740 | 32.99191412467516 |

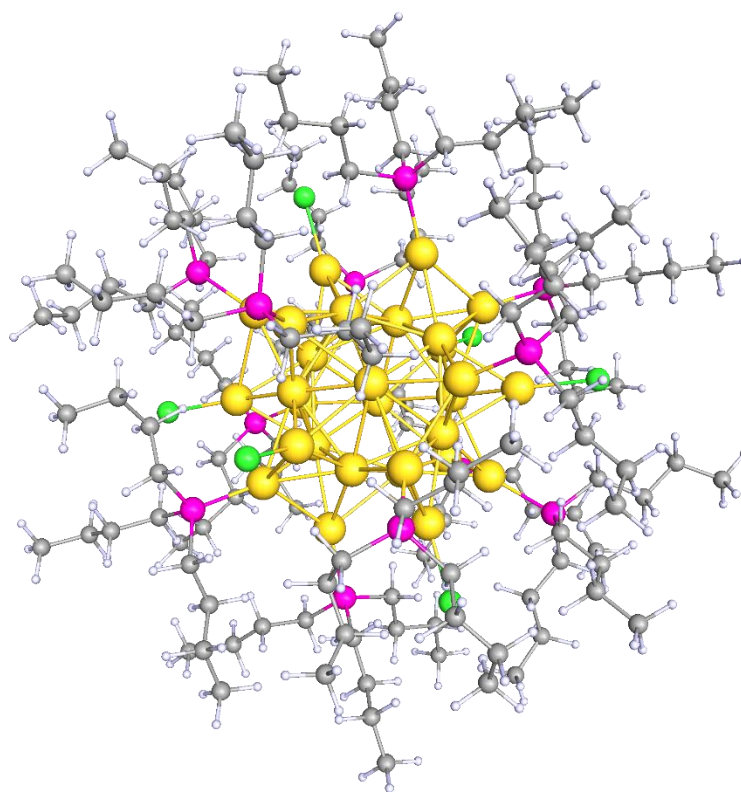

Figure S14: Geometry optimized structure of  $\text{Au}_{30}(\mu^3\text{PBu}_3)_{12}\text{Cl}_6$

Point group:  $C_1$

Energy: -16612.75788117461 H

HOMO-LUMO-Gap: 0.855 eV

|       |                   |                   |                   |       |                   |                   |                   |
|-------|-------------------|-------------------|-------------------|-------|-------------------|-------------------|-------------------|
| 1 au  | 25.10204023843793 | 26.23523233562979 | 34.24541789912931 | 2 au  | 23.02561295218068 | 27.14070751485702 | 29.10303838982716 |
| 3 au  | 30.47601903838007 | 27.41165212283811 | 34.43536878945745 | 4 au  | 27.05245918908325 | 30.65157472842295 | 31.51928740159018 |
| 5 au  | 28.67692421713901 | 21.91510128613939 | 33.75153900328131 | 6 au  | 24.02493532577913 | 21.97412012986226 | 30.54347782197746 |
| 7 au  | 27.99683160450979 | 24.38887140982436 | 38.37241206863840 | 8 au  | 26.65126989279637 | 30.84843318650414 | 36.79119440718751 |
| 9 au  | 21.98674610928589 | 30.51889488043957 | 33.46650004571170 | 10 au | 20.11251895480966 | 24.89391607718420 | 33.06432883190524 |
| 11 au | 23.89916583167928 | 20.96226130517021 | 35.87725948296443 | 12 au | 25.55064736046667 | 23.76731960330700 | 25.46189719603053 |
| 13 au | 27.39582879431847 | 29.21872372512416 | 26.24355287157598 | 14 au | 23.24541210334522 | 32.26558965125505 | 27.80691049466736 |
| 15 au | 22.45029999464159 | 28.01078047710579 | 23.86717173264374 | 16 au | 20.40965117950301 | 23.19378389421769 | 26.36991786933935 |
| 17 au | 33.01184624508553 | 23.98539619834166 | 30.82204197105172 | 18 au | 32.02586129007004 | 29.10581507631615 | 29.31757355511655 |
| 19 au | 33.59105443024276 | 23.35059497471024 | 36.13543156885796 | 20 au | 35.62802362063299 | 28.02658900309748 | 33.48546457291818 |
| 21 au | 30.07370216005901 | 33.7753746502063  | 27.95097796890287 | 22 au | 28.98579669621929 | 20.46882319394610 | 28.54364710172060 |
| 23 au | 32.89827003302732 | 18.93260255933919 | 32.29818673259710 | 24 au | 25.95687070534881 | 17.32342467479716 | 32.01284181907708 |
| 25 cl | 28.01856112582408 | 24.86727151590218 | 43.00284610806054 | 26 h  | 30.72087371843055 | 18.31780973135105 | 38.54462784570852 |
| 27 p  | 27.50259760536987 | 32.57072532592986 | 40.86063734311401 | 28 p  | 18.05500335446700 | 32.60150128334133 | 33.73217563661382 |
| 29 cl | 15.68559348168943 | 23.80155339694732 | 34.19526253495334 | 30 p  | 21.44813795416568 | 19.95681443105544 | 39.4931069946959  |
| 31 au | 30.91279605697379 | 24.78091121501382 | 25.63211335495917 | 32 au | 27.99594427126458 | 26.75678200419949 | 21.57843654780187 |
| 33 au | 29.26015565943242 | 20.04228458504218 | 23.30186808210569 | 34 au | 32.17406268390782 | 30.12087499291562 | 24.03413709247572 |
| 35 cl | 21.47697185253638 | 36.58971233351953 | 27.29221501524334 | 36 p  | 20.77323243125935 | 30.23285257123186 | 20.38419556484671 |
| 37 p  | 16.37278375716428 | 21.26716790694359 | 26.05007053216811 | 38 au | 33.92798247110611 | 20.36148900100668 | 26.54324397125559 |
| 39 au | 35.89797984522826 | 26.09638213738248 | 26.81670501013107 | 40 p  | 35.33702255365586 | 21.28017702031343 | 39.66914452481380 |
| 41 p  | 39.65512490406643 | 30.01191707571822 | 33.58311022372543 | 42 p  | 29.24858902340267 | 38.17990172928149 | 28.40344434709390 |
| 43 cl | 34.93520314911225 | 14.83980964681814 | 33.36191755935776 | 44 p  | 26.72542982205064 | 12.90516391003252 | 31.66441443953273 |
| 45 c  | 31.23155004836028 | 17.70096417013323 | 40.49352140898561 | 46 c  | 27.85149927315774 | 36.08164709479185 | 40.66077879320795 |
| 47 c  | 30.46153159057717 | 31.43692438625359 | 42.36251666831310 | 48 c  | 25.24141813061406 | 32.01874525809609 | 43.50513403075430 |
| 49 c  | 15.82622466252029 | 30.88791044238398 | 35.84801718802890 | 50 c  | 18.18218544196625 | 35.91766888636960 | 34.89832813955836 |
| 51 c  | 16.44442960574269 | 32.83212230086183 | 30.60039280060707 | 52 h  | 15.97161346455390 | 28.86382889339008 | 35.27399531613609 |
| 53 c  | 22.87262668991135 | 17.63665623329949 | 41.67226353941544 | 54 c  | 20.91219433559221 | 22.64529984321936 | 41.62618216548042 |
| 55 c  | 18.26480897519305 | 18.72011174416194 | 38.61639466330983 | 56 cl | 27.81542716399957 | 26.56935612265201 | 16.91867286496347 |

|       |                   |                    |                   |       |                   |                   |                   |
|-------|-------------------|--------------------|-------------------|-------|-------------------|-------------------|-------------------|
| 57 h  | 25.63776843650362 | 32.79376700552851  | 21.44069222773354 | 58 p  | 28.33926398301376 | 18.09578464278250 | 19.35179384979936 |
| 59 p  | 34.58617426107068 | 30.91713133948216  | 20.38165595914808 | 60 c  | 23.23510185971429 | 31.63506855430339 | 18.30123103205349 |
| 61 c  | 18.56458894733933 | 32.78954836814286  | 21.38616438258054 | 62 c  | 18.96465967767167 | 28.38978253085472 | 17.98789817682826 |
| 63 c  | 13.62691175282871 | 19.340566815385727 | 25.51792046145524 | 64 c  | 16.29023974539587 | 19.05680627844378 | 23.29575378592021 |
| 65 c  | 15.34507231586985 | 23.6465267166033   | 28.80866362359347 | 66 p  | 37.93449741466311 | 18.49189917269015 | 25.98019665268923 |
| 67 d  | 40.37817743670909 | 26.89978358302874  | 25.62764168679511 | 68 c  | 32.94483348221885 | 19.71239024724394 | 41.71727149929633 |
| 69 c  | 37.78262880780015 | 18.92540307688190  | 38.74003676052483 | 70 c  | 36.91812091348847 | 23.32515710647825 | 42.06502486852457 |
| 71 c  | 42.37894786665740 | 27.92578860956698  | 34.37313889921225 | 72 c  | 39.77762754775077 | 32.52713497947066 | 36.06013189944733 |
| 73 c  | 40.72485277577356 | 31.59102663975378  | 30.64523879153590 | 74 c  | 32.10017583834171 | 40.20322417190073 | 28.86097622492804 |
| 75 c  | 27.50268886825769 | 39.56911507626721  | 25.68949899911994 | 76 c  | 27.24009763295469 | 38.77066712689631 | 31.24790182457535 |
| 77 c  | 23.85504964238042 | 10.85794203335666  | 31.69650382264867 | 78 c  | 28.84884361967820 | 11.64117863989379 | 34.15746301950792 |
| 79 c  | 28.27614633988563 | 12.19376044262122  | 28.56521819880829 | 80 h  | 29.42037287570123 | 17.69448789339851 | 41.57060309237800 |
| 81 c  | 32.27103101903383 | 14.98273582056466  | 40.41986254187539 | 82 h  | 29.30587074623433 | 36.41829736185966 | 39.17684818504414 |
| 83 h  | 26.04901022100586 | 36.79920625718599  | 39.84338258519214 | 84 c  | 28.52135033066929 | 37.51631373532786 | 43.09673650822227 |
| 85 h  | 30.59775952710849 | 32.40554761542053  | 44.22731185844213 | 86 h  | 30.12576421642048 | 29.38912717649911 | 42.74751208938536 |
| 87 c  | 32.88533864754918 | 31.79614128560006  | 40.81318105778675 | 88 h  | 25.11482221329634 | 29.92431620925944 | 43.68684626964799 |
| 89 h  | 26.18546806192083 | 32.71430232506940  | 45.25661411694486 | 90 c  | 22.61821126352290 | 33.22675069309900 | 43.23814730044224 |
| 91 h  | 16.67350154675671 | 30.99696563135194  | 37.77061354135790 | 92 c  | 13.03525646811481 | 31.70659875277211 | 35.85664025454266 |
| 93 h  | 16.22622110517598 | 36.68738414320637  | 34.87507897698338 | 94 c  | 19.38983507415139 | 36.21300500577648 | 37.52022861952043 |
| 95 h  | 17.99175382502099 | 32.92121118920662  | 29.17979025319313 | 96 h  | 15.48762401636566 | 30.96683643730357 | 30.33025788779922 |
| 97 c  | 14.61995679624914 | 35.05113914816553  | 30.18901647993523 | 98 h  | 24.68766536933038 | 18.51147532293867 | 42.28279899400154 |
| 99 h  | 21.63051732662653 | 17.57420236674103  | 43.37386204426622 | 100 c | 23.32282076027049 | 14.95515107988283 | 40.66559152512783 |
| 101 h | 19.90250380584996 | 21.85942939839199  | 43.29886047564491 | 102 h | 22.82676815777298 | 23.24433678807529 | 42.27648500803139 |
| 103 c | 19.48334526749472 | 24.90134207749143  | 40.49562606093174 | 104 h | 17.45874645887977 | 20.12135657685831 | 37.26117374476781 |
| 105 h | 18.60352867522387 | 16.97182286745024  | 37.49368630920267 | 106 c | 16.40569916802448 | 18.21233226609377 | 40.79029406400603 |
| 107 c | 25.14257236273317 | 33.47297816572170  | 19.50845716175585 | 108 c | 26.78883966792292 | 14.95804162164313 | 19.80382107525416 |
| 109 c | 26.18652119213738 | 19.86808265308410  | 17.22861035900696 | 110 c | 31.05188824932189 | 17.45917218450835 | 17.19456441168997 |
| 111 c | 33.4030856129089  | 33.49525594343126  | 18.29476012424386 | 112 c | 34.63777857105465 | 28.24926784312145 | 18.10725105620226 |
| 113 c | 37.93935997281334 | 31.69599972413021  | 21.06845604756895 | 114 h | 24.27638298217843 | 29.94714345692733 | 17.58350313087770 |
| 115 h | 22.26656142789550 | 32.49966071125302  | 16.64326300497070 | 116 h | 17.11672169868107 | 31.84829018078766 | 22.95153870351076 |
| 117 h | 19.65955165005240 | 34.01117683553372  | 22.70456401827161 | 118 c | 17.28638949418301 | 34.31428019780406 | 16.2693563857586  |
| 119 h | 18.51456913156441 | 29.71256938111663  | 16.41057155763533 | 120 h | 20.32207657268500 | 26.98095838578058 | 17.22090909073077 |
| 121 c | 16.55163569814764 | 27.06837137009955  | 18.90659089496197 | 122 h | 13.77479348752499 | 24.08696215210316 | 23.5333432929423  |
| 123 h | 11.87819160323231 | 22.23448810681918  | 25.64098489059713 | 124 c | 13.48049192957803 | 25.63646303108134 | 27.38002694190769 |
| 125 h | 16.78611936846767 | 20.23012485783931  | 21.61774702285472 | 126 h | 17.92022544657265 | 17.75890748581690 | 23.57792020355303 |
| 127 c | 13.83159794845304 | 17.57839916948562  | 22.82282071265623 | 128 h | 15.15155763470515 | 20.72112618989591 | 30.41350444916723 |
| 129 h | 13.42508969007313 | 18.61929080442248  | 28.36832197531379 | 130 c | 17.16923581050690 | 17.23835497318841 | 29.56717462322460 |
| 131 c | 39.75111483402099 | 20.26986234103445  | 23.55221969899889 | 132 c | 38.00002399000484 | 15.14533180457335 | 24.88975850302633 |
| 133 c | 39.73952966724141 | 18.50534629460537  | 28.99926336023242 | 134 h | 39.98426038683969 | 22.20619180492894 | 23.5637550542011  |
| 135 h | 31.75536525340266 | 21.32421299947771  | 42.37649379834831 | 136 h | 33.93636010011269 | 18.95801024645301 | 43.41509826237049 |
| 137 h | 39.14315567489798 | 19.98532768367864  | 37.53075609892456 | 138 h | 36.81947277926405 | 17.58795276254677 | 37.42932320747585 |
| 139 c | 39.19137187478690 | 17.55621194121946  | 40.88425164141249 | 140 h | 37.41674782675847 | 22.08766229244827 | 43.69643653875158 |
| 141 h | 35.43288956696215 | 24.65008128100811  | 42.74740849766231 | 142 c | 39.25720955337358 | 24.78402063308796 | 41.16053854356942 |
| 143 h | 42.1559846303106  | 27.39613217932943  | 36.39672558737588 | 144 h | 44.13173462617288 | 29.08806428225125 | 34.22604241757421 |
| 145 c | 42.59921661790590 | 25.56218074475045  | 32.69094334665214 | 146 h | 39.41838448539725 | 31.53528430592295 | 37.88239799835345 |
| 147 h | 38.08557309466956 | 33.72879301812557  | 35.72614072456388 | 148 c | 42.19442644081676 | 34.13477325746943 | 36.23594948548618 |
| 149 h | 40.87573125020417 | 30.08738962282194  | 29.17292887949736 | 150 h | 42.66879875999001 | 32.30895739414454 | 31.02122697721331 |
| 151 c | 38.98060232592731 | 33.70001587518993  | 29.67915620698867 | 152 h | 33.11576470359228 | 39.41052922005282 | 30.52637125526321 |
| 153 h | 31.46947307326729 | 42.13763399861350  | 29.39617846995608 | 154 c | 33.88016289888974 | 40.34191405485463 | 26.57176747149895 |
| 155 h | 25.78597739552121 | 38.35937175939986  | 25.51331607004689 | 156 h | 28.69057668490181 | 39.19130833339985 | 23.99253988335838 |
| 157 c | 26.22237461496233 | 42.36575574610396  | 25.80775454320342 | 158 h | 27.68547617305515 | 37.23005827576234 | 32.60827674877977 |
| 159 h | 25.27842525530182 | 38.38518183028650  | 30.57771259706500 | 160 c | 27.43647377919081 | 41.36460392716540 | 32.54993854544020 |
| 161 h | 22.69044009944211 | 11.46303056392005  | 30.04982226808626 | 162 h | 24.44411191689733 | 8.87129335607416  | 31.32916549508533 |
| 163 c | 22.80723031142211 | 10.997633959410964 | 34.13148596362617 | 164 h | 30.54344953632319 | 12.89765946438103 | 34.11421768626401 |
| 165 h | 27.86990075591759 | 12.04043076974486  | 35.97901491216582 | 166 c | 29.68441221098655 | 8.86108204984538  | 34.02409582726843 |
| 167 h | 27.57671876482911 | 13.65949646179265  | 27.22953780337258 | 168 h | 30.31188231297848 | 12.63958976928695 | 28.86963612676760 |
| 169 c | 27.92236196448872 | 9.54028814331282   | 27.42427080154145 | 170 c | 32.66959024365874 | 13.75837882005463 | 43.02047065532263 |
| 171 h | 30.91130345781460 | 13.81125697084035  | 39.32270612035440 | 172 h | 34.05145333178455 | 14.91106899116747 | 39.30586662438882 |
| 173 h | 27.05452688583819 | 37.16344437368062  | 44.56711738115931 | 174 h | 30.32977128740457 | 36.78196990044608 | 43.88787546920656 |
| 175 c | 28.77258067615663 | 40.38706587999003  | 42.68899120049294 | 176 h | 32.76099063199936 | 30.62297210413023 | 39.06722974331686 |
| 177 h | 33.07685788115802 | 33.79783457640177  | 40.17426438546093 | 178 c | 35.27378827161530 | 31.05598604008627 | 42.30594785815111 |
| 179 h | 22.80041301661176 | 35.25894513989048  | 42.70923194052218 | 180 h | 21.57835618109439 | 32.30384757122728 | 41.65957703689261 |
| 181 c | 21.06145723121884 | 33.05232526101037  | 45.69068165309071 | 182 h | 12.27356962064646 | 31.52959593775206 | 33.90500073617100 |
| 183 h | 12.85003925750698 | 33.73894313586088  | 36.38868281544398 | 184 c | 11.36345890538398 | 30.09503681763120 | 37.62404251998819 |
| 185 c | 19.49198515519517 | 38.96666923139153  | 38.46919761874269 | 186 h | 21.34049105146892 | 35.42237078212231 | 37.45282128005072 |
| 187 h | 18.33978476021666 | 35.05234777985441  | 38.93116875754176 | 188 c | 13.22578253078062 | 34.89626028051645 | 27.64427903273243 |
| 189 h | 13.19798395598962 | 35.16585008028794  | 31.73693386109975 | 190 h | 15.71786812769137 | 36.84386149527425 | 30.2376771352561  |
| 191 h | 21.51712987246027 | 14.140626034726    | 39.94664938995175 | 192 h | 24.63042007202716 | 15.03629846530566 | 39.01571742711313 |
| 193 c | 24.40460351563316 | 13.19395944028156  | 42.71504275044079 | 194 h | 17.67482153537895 | 24.28530764363798 | 39.61272324556594 |
| 195 h | 20.62878037906887 | 25.71027095924265  | 38.92581808437657 | 196 c | 18.93717693759332 | 26.97680561481251 | 42.46048551439807 |
| 197 h | 17.20844403409043 | 16.806458076688701 | 42.14150982267889 | 198 h | 16.09801396103571 | 19.98031435462236 | 41.89193905441717 |
| 199 c | 13.82846724446468 | 17.25491321901691  | 39.83418439120279 | 200 h | 26.92613012881149 | 33.32666424481902 | 18.39682423498629 |
| 201 c | 24.35404850475497 | 36.27270199822986  | 19.62128135007073 | 202 h | 25.12163606436719 | 15.32555321658804 | 21.03443645939401 |
| 203 h | 28.11211537665300 | 13.81849771352504  | 20.97828470537087 | 204 c | 26.00434122741297 | 13.49452644364625 | 17.41949905818579 |
| 205 h | 26.10264292994566 | 18.81486469762356  | 15.40705630929880 | 206 h | 27.11715654445615 | 21.72455485668316 | 16.85291869049480 |
| 207 c | 23.53300754600519 | 20.33057314772189  | 18.30712683176501 | 208 h | 31.95319895496416 | 19.33136726041375 | 16.86773115635268 |
| 209 h | 30.26040932062056 | 16.83910042017743  | 15.34271570584749 | 210 c | 33.01970986476247 | 15.54631481194426 | 18.13691948324221 |
| 211 h | 31.46703341517524 | 32.89915273014735  | 17.72338408298066 | 212 h | 34.58239288396970 | 33.47003884523937 | 16.54814108552605 |
| 213 c | 33.35033270033364 | 36.16296302490228  | 19.43130583270275 | 214 h | 35.75388767451560 | 28.89486087956368 | 16.44218574409281 |
| 215 h | 32.64066994874803 | 28.00571589103772  | 17.47185347869005 | 216 c | 35.64311599010068 | 25.73792721414288 | 19.15461608786226 |
| 217   |                   |                    |                   |       |                   |                   |                   |

|       |                   |                    |                   |       |                    |                    |                    |
|-------|-------------------|--------------------|-------------------|-------|--------------------|--------------------|--------------------|
| 239 h | 36.94335614138332 | 15.10191171969057  | 23.06986570182095 | 240 h | 38.39562282326555  | 17.68566513099752  | 30.40098956538379  |
| 241 h | 39.9372237212871  | 20.53509726490841  | 29.51817600608860 | 242 c | 42.29412681271855  | 17.11492633896228  | 29.13530369047995  |
| 243 h | 40.18286725631333 | 18.97100621746185  | 42.08765012289498 | 244 h | 37.81662585433602  | 16.57588798738856  | 42.14360252971841  |
| 245 c | 41.15725325122109 | 15.61426766163589  | 39.94552585115710 | 246 h | 40.60969329760425  | 23.47525393659443  | 40.21313215628138  |
| 247 h | 38.67331231743994 | 26.18050771145608  | 39.69528358355392 | 248 c | 40.63701077646919  | 26.12619458868341  | 43.34368268309358  |
| 249 c | 45.11891603615451 | 24.139910277104341 | 33.02902180853819 | 250 h | 42.39951924312255  | 26.08927281195730  | 30.66388889824131  |
| 251 h | 40.98126492245962 | 24.27780973117764  | 33.10320552112729 | 252 h | 43.86792597819422  | 32.87578860592197  | 36.44319958292777  |
| 253 h | 42.47527263275508 | 35.19557748290006  | 34.43836051702370 | 254 c | 42.19492655465256  | 36.02858138115502  | 38.45512594236588  |
| 255 h | 38.61252412866720 | 35.12530897353319  | 31.19093711479289 | 256 h | 37.11361608794975  | 32.85798766577253  | 29.18652811675531  |
| 257 c | 40.07068562606857 | 35.05613992608424  | 27.34308343857261 | 258 h | 32.84488906425376  | 41.12421964749356  | 24.91266696913816  |
| 259 h | 34.47990252845079 | 38.39720805968068  | 26.02579369415900 | 260 c | 36.22227868363728  | 41.99279450395531  | 27.07927667647232  |
| 261 h | 25.39865031025740 | 42.64755369854745  | 27.41844965814492 | 262 h | 28.39300718910998  | 43.59889275438719  | 26.17586482759828  |
| 263 c | 25.40288261210074 | 43.25152920641255  | 23.36981472762841 | 264 h | 29.35702870096315  | 41.60693432097792  | 33.38128144515034  |
| 265 h | 27.20915034631156 | 42.91828451843990  | 31.14927029836820 | 266 c | 25.45369659543335  | 41.71241249051098  | 34.64753057278439  |
| 267 h | 23.46642815661563 | 10.45684340575581  | 35.78587939519762 | 268 h | 21.68953637408239  | 12.99220309832897  | 34.46475635481978  |
| 269 c | 19.94156077679161 | 9.26898408547357   | 34.04201892694893 | 270 h | 30.78142176166045  | 8.54795863417519   | 32.25508023909144  |
| 271 h | 28.01636737998554 | 7.57379917449648   | 33.93378593493438 | 272 c | 31.35672023947600  | 8.10971187135876   | 36.28444454701175  |
| 273 h | 25.87817632852400 | 9.19062985779253   | 27.05987920510018 | 274 h | 28.53081049848468  | 8.06075565952600   | 28.79071575464141  |
| 275 c | 29.3803691615237  | 9.17611744437262   | 24.93501380387739 | 276 h | 33.32344419772791  | 11.76900097954834  | 28.788686161425    |
| 277 h | 30.88582985311254 | 13.73598654380192  | 44.13984013048136 | 278 h | 34.11049971014089  | 14.76858701142886  | 44.17449371991111  |
| 279 h | 30.24287719854270 | 40.74904772966008  | 41.22275945665591 | 280 h | 26.97051581915899  | 41.13341631073469  | 41.89095207012406  |
| 281 c | 29.43762854948709 | 41.83721724999352  | 45.11040010940051 | 282 h | 36.88958345284918  | 30.97129231620274  | 40.96072771438553  |
| 283 h | 35.02907070236157 | 29.09764827218194  | 43.03883209185106 | 284 c | 35.96140051081224  | 32.83836904348885  | 44.49026151326317  |
| 285 h | 22.12460334862973 | 34.00159858275912  | 47.24482784623236 | 286 h | 20.89302314628944  | 31.03297373930573  | 46.2627114082364   |
| 287 c | 18.42000454290735 | 34.22545909044915  | 45.4727923283525  | 288 h | 9.34698455928042   | 30.52387142489139  | 37.19032924280202  |
| 289 h | 11.65041960837577 | 28.06336021578506  | 37.14987953443791 | 290 c | 11.82117849356795  | 30.52343561341153  | 40.45501134172187  |
| 291 h | 20.55579181771684 | 40.13376567957597  | 37.07546932227122 | 292 h | 20.62969169172027  | 39.00439155995147  | 40.24253073311960  |
| 293 c | 16.90991252391368 | 40.18457819415589  | 38.98859281106118 | 294 h | 14.65233472092394  | 34.79318518168662  | 26.09949628678729  |
| 295 h | 12.13054914208790 | 33.09820738349466  | 27.55730325798282 | 296 c | 11.44631933424485  | 37.13856562986374  | 27.18393496971182  |
| 297 h | 26.21962418073087 | 13.99843098724026  | 43.42095187958207 | 298 h | 23.09862438062404  | 13.18626270436921  | 44.37019096340323  |
| 299 c | 24.83649782007641 | 10.47047195108758  | 41.82547655508409 | 300 h | 20.75219829432880  | 27.57027304385443  | 43.34856315328650  |
| 301 h | 18.21054869754245 | 28.66687562616546  | 41.43449773855790 | 302 c | 17.03521836003570  | 26.24223212573332  | 44.52614972051189  |
| 303 h | 13.04833474182619 | 18.66223093628373  | 38.47573444086818 | 304 h | 14.11708270521333  | 15.48189828452211  | 38.73027172095942  |
| 305 c | 11.91756937689692 | 16.77404544381325  | 41.96102938894441 | 306 c | 24.05470141112864  | 37.58160523833378  | 17.03672094871710  |
| 307 h | 25.82118414815493 | 37.30443665970777  | 20.71904568739042 | 308 h | 22.58751561613777  | 36.49120351052025  | 20.74061848990170  |
| 309 h | 27.69418742760811 | 13.11070118671000  | 16.22106958649556 | 310 h | 24.71288193264663  | 14.67385391909747  | 16.24654714373766  |
| 311 c | 24.68207224206007 | 10.97222808322713  | 18.01998299902215 | 312 h | 23.70784311206231  | 21.41879216013066  | 20.10315110377276  |
| 313 h | 22.60123451155946 | 18.50230104394744  | 18.79893423486034 | 314 c | 21.81825364310842  | 21.80665515402261  | 16.47593375346093  |
| 315 h | 32.09844517080778 | 13.68745845549296  | 18.50797728633435 | 316 h | 33.79959113445111  | 16.19344744468759  | 19.98442767338583  |
| 317 c | 35.17892963866859 | 15.15673259443392  | 16.22352239546310 | 318 h | 35.27019903785737  | 36.694339271728590 | 20.11962624911318  |
| 319 h | 32.09568267305099 | 36.17724065746172  | 21.12419170551441 | 320 c | 32.45536853107865  | 38.15257315406014  | 17.50464341130564  |
| 321 h | 37.61393086421048 | 25.95782032300882  | 19.86471741750158 | 322 h | 34.48483352740951  | 25.19270078356856  | 20.82744730871560  |
| 323 c | 35.53737263928382 | 23.58718974953308  | 17.19385851348238 | 324 h | 39.10813733486653  | 33.40570525610340  | 17.46976068132906  |
| 325 h | 39.79387754343021 | 30.11571308480565  | 17.74111255934547 | 326 c | 42.48055105657568  | 32.53825034857378  | 19.66928124171669  |
| 327 h | 14.45398356086525 | 37.18116340592717  | 18.56273573269108 | 328 h | 14.13140453302882  | 35.65915614572332  | 21.54201184353931  |
| 329 c | 16.93075671372231 | 38.68118381697013  | 21.47355897176742 | 330 h | 16.33101259883761  | 24.51725985981794  | 15.68443910243971  |
| 331 h | 14.56768591133375 | 27.35380463915131  | 15.32105061509924 | 332 c | 12.65962511778266  | 24.46997323794285  | 17.53750856809342  |
| 333 h | 10.99426803426602 | 28.58270957109091  | 28.73072293583856 | 334 h | 9.38679202407357   | 25.78814322966732  | 27.79678865815783  |
| 335 c | 10.35506844258977 | 28.29837751652763  | 24.68464294976969 | 336 h | 11.97657761730962  | 15.09836197887948  | 20.14641425840093  |
| 337 h | 14.32478809114831 | 17.06630506050316  | 18.76350020190951 | 338 c | 15.79941167665881  | 13.68086169301241  | 20.58712964817657  |
| 339 h | 15.82021581975786 | 17.01739049253156  | 33.4325529942905  | 340 h | 17.78126868943515  | 14.45136460337015  | 32.49490213617958  |
| 341 c | 13.86965564010746 | 14.06294943876645  | 31.32360530078643 | 342 h | 43.61086354265612  | 18.94713790513038  | 24.22558065180729  |
| 343 h | 42.06102518339068 | 17.36910703489423  | 21.68615399740024 | 344 c | 43.56188486427886  | 21.07805115527909  | 20.72049354174179  |
| 345 h | 37.79472241916071 | 13.457675758645600 | 28.65490303838892 | 346 h | 34.86664442433843  | 13.60959416041364  | 27.07255276290645  |
| 347 c | 37.28658610627976 | 10.46431682436843  | 25.89530379319404 | 348 c | 43.14589389392265  | 16.63229442661424  | 31.87539573906799  |
| 349 h | 43.77896199593349 | 18.21855399000649  | 28.13142650418613 | 350 h | 42.17896195154348  | 15.25914201652866  | 28.14669205706225  |
| 351 h | 42.35492441553061 | 15.05085032470143  | 41.58533066931165 | 352 h | 42.456882172343383 | 16.56401314702069  | 38.58307209576270  |
| 353 c | 40.03408467551970 | 13.234515394868645 | 38.72607787312287 | 354 h | 39.28851473818069  | 27.40599179118190  | 44.33355797244214  |
| 355 h | 41.21415921600488 | 24.68664873359964  | 44.77170780078386 | 356 c | 42.96786001691598  | 27.63364378014634  | 42.51009242211398  |
| 357 h | 45.15901017708937 | 22.55345341421058  | 31.64557588286903 | 358 h | 46.70781117013852  | 25.41268689987725  | 32.47785696833547  |
| 359 c | 45.6022129483528  | 23.09514123849982  | 35.69110394772434 | 360 h | 44.09775721681001  | 36.92703885143936  | 38.584498481954526 |
| 361 h | 41.97271991074670 | 34.97189340847673  | 40.26577922181204 | 362 c | 40.17698000426497  | 38.10609724964220  | 38.28967296050589  |
| 363 h | 40.53861074229427 | 33.60858599701169  | 25.89057423542023 | 364 h | 38.55175862263373  | 36.25235330554118  | 26.50857015550205  |
| 365 c | 42.39858083577233 | 36.70976519231454  | 27.86019402537349 | 366 h | 35.59496385590662  | 43.88745038853455  | 27.75940967299764  |
| 367 h | 37.33002747518512 | 41.15033244555991  | 28.66207607034504 | 368 c | 37.93338446121329  | 42.32317296797059  | 24.76260487605095  |
| 369 h | 23.73573492397147 | 42.01463215445887  | 23.02013840671410 | 370 h | 26.70099467575431  | 42.96093004732899  | 21.73423837973861  |
| 371 c | 24.56350202303123 | 46.02514037527149  | 23.46315207195409 | 372 h | 25.65083348116234  | 40.15319804437296  | 36.05105151805034  |
| 373 h | 23.53339432708758 | 41.49344679943295  | 33.81046558141384 | 374 c | 25.64729090831213  | 44.27229481600942  | 37.95479447488474  |
| 375 h | 20.56358436623920 | 7.28524830596105   | 33.69120352263312 | 376 h | 18.75343468165577  | 9.80007717736562   | 32.38424813185881  |
| 377 c | 18.33316615363566 | 9.36391972862996   | 36.45162298158372 | 378 h | 33.01149419117524  | 9.40828676788645   | 36.34959125376516  |
| 379 h | 30.28663367403971 | 8.43267162454348   | 38.07201844861684 | 380 c | 32.26165066685760  | 5.35757329918631   | 36.17875707983841  |
| 381 h | 28.77474629404911 | 10.65686262371019  | 23.6398179143699  | 382 h | 31.43019863748483  | 9.51229502841546   | 25.27494810120684  |
| 383 c | 29.00403174209512 | 6.55080211306214   | 23.76402895423845 | 384 h | 29.60443951972303  | 43.90082791405695  | 47.46988624207316  |
| 385 h | 27.96682648489157 | 41.57111201733335  | 46.59158832702119 | 386 h | 31.26824682008885  | 41.18442169315654  | 45.91697109027845  |
| 387 h | 37.73621571629531 | 32.22871127751348  | 45.43944323418220 | 388 h | 36.25673779076370  | 34.80682585008785  | 43.80374194169234  |
| 389 h | 34.46667460805713 | 32.90041308401253  | 45.96813964818337 | 390 h | 17.36490823880484  | 34.08051847958711  | 47.28522989255752  |
| 391 h | 18.52453234126017 | 36.26483522351066  | 44.96131795914479 | 392 h | 17.27377927505009  | 33.26249167581198  | 43.99500635912501  |
| 393 h | 10.50608956436710 | 29.36548188166966  | 41.61675253709564 | 394 h | 13.77348908726001  | 29.99803945843556  | 41.03111448378736  |
| 395 h | 11.52186987626391 | 32.53996205934602  | 40.98226846643333 | 396 h | 17.13074915859484  | 42.12291225729009  | 39.77283179538039  |
| 397 h | 15.7477123695280  | 40.3527153609553   | 37.24457938496801 | 398 h | 15.80362478947332  | 39.05971302254427  | 40.38209884134393  |
| 399 h | 10.46779500210150 | 36.97635064692805  | 25                |       |                    |                    |                    |

|       |                   |                   |                   |       |                   |                   |                   |
|-------|-------------------|-------------------|-------------------|-------|-------------------|-------------------|-------------------|
| 421 h | 36.15695298964553 | 16.99607057701229 | 15.90723355809962 | 422 c | 37.10867404812068 | 13.14917954609266 | 17.02881650500285 |
| 423 h | 30.53133927919816 | 37.63119164702848 | 16.82125414991431 | 424 h | 33.70643242506839 | 38.07543425386807 | 15.80941979819818 |
| 425 c | 32.41357178642710 | 40.85828334831176 | 18.54067748087090 | 426 h | 33.55372373735283 | 23.41254503656440 | 16.50618512297536 |
| 427 h | 35.98325653183657 | 21.78156794168176 | 18.18423781635302 | 428 c | 37.33284975013450 | 23.88457138761915 | 14.93309823828256 |
| 429 h | 43.10401200060136 | 31.06730878764137 | 21.04079517045513 | 430 h | 42.47765195508877 | 34.35761593099362 | 20.73406645267967 |
| 431 c | 44.36400568886722 | 32.70373508588637 | 17.47127050263873 | 432 h | 15.56519820461519 | 40.17039560291879 | 22.05663316652639 |
| 433 h | 17.99738014521777 | 38.09703127076470 | 23.18935915189351 | 434 h | 18.30180054438674 | 39.56955897542466 | 20.14627138711108 |
| 435 h | 11.63149662631547 | 23.67372326307158 | 15.88530939121312 | 436 h | 13.09540467173560 | 22.87222704270573 | 18.83624714784690 |
| 437 h | 11.33805985967308 | 25.75905633571139 | 18.54595334611541 | 438 h | 8.58326058891184  | 29.42706820836371 | 24.77272027820657 |
| 439 h | 11.90019917600279 | 29.59001283634895 | 24.07248663086727 | 440 h | 10.09881542698029 | 26.85890130303923 | 23.17244645383352 |
| 441 h | 15.66810896853426 | 12.46902104059127 | 18.87452794598515 | 442 h | 17.78771316039386 | 14.35173305858190 | 20.72244891547917 |
| 443 h | 15.42772303161572 | 12.45653387879305 | 22.25856450125091 | 444 h | 13.34092409195517 | 12.93309371354074 | 33.01641991481826 |
| 445 h | 12.19159632151704 | 15.22312517234158 | 30.81298906169420 | 446 h | 14.21104557588794 | 12.71181632625571 | 29.74416257450127 |
| 447 h | 43.76211210828989 | 22.96182553407397 | 21.63885722719026 | 448 h | 42.27003334751318 | 21.37476446258430 | 19.08110263219459 |
| 449 c | 46.14091117472103 | 20.15479323412709 | 19.77096368062248 | 450 h | 36.20354664091631 | 10.12848421138102 | 24.11681827867821 |
| 451 h | 39.31335757301545 | 10.16795783578270 | 25.39198472310245 | 452 c | 36.51936002650871 | 8.51807347716936  | 27.90389447951488 |
| 453 h | 41.66374906251646 | 15.50485385096748 | 32.85760146069253 | 454 h | 43.24639590630152 | 18.46879923913891 | 32.90196013962642 |
| 455 c | 45.70210281458235 | 15.27650549161926 | 32.05554246483994 | 456 h | 41.55653835834403 | 11.91676117251591 | 38.11798293491623 |
| 457 h | 38.86221694486540 | 13.67497171901019 | 37.03668584714954 | 458 h | 38.81075118836971 | 12.19668547978944 | 40.0889962293091  |
| 459 h | 43.92899399989803 | 28.53114744501524 | 44.15038862958331 | 460 h | 42.45007286571509 | 29.16772319831935 | 41.16601588413755 |
| 461 h | 44.37586897652147 | 26.40129641428283 | 41.54725090227503 | 462 h | 47.38616832819497 | 21.98486617984733 | 35.76174407309733 |
| 463 h | 44.04000073813205 | 21.82369236456990 | 36.30476850288538 | 464 h | 45.76582792134735 | 24.62697029383997 | 37.12327202738862 |
| 465 h | 40.36643058527434 | 39.46881524469602 | 39.87905882632167 | 466 h | 38.22664955939182 | 37.32474017141512 | 38.36987124417563 |
| 467 h | 40.3507785185770  | 39.19628454169459 | 36.49739048299530 | 468 h | 43.03892890892497 | 37.68773237078555 | 26.11224674313276 |
| 469 h | 44.03004863211615 | 35.58534142881745 | 28.56516163948561 | 470 h | 41.98274703774437 | 38.19302105796088 | 29.29651604219002 |
| 471 h | 39.61238904772826 | 43.50516686790782 | 25.21222267647522 | 472 h | 36.90588733695074 | 43.25367362598735 | 23.17985835122679 |
| 473 h | 38.63394581387579 | 40.46967854446827 | 24.05693771606918 | 474 h | 23.61891179408586 | 46.60099287133698 | 21.67546241245155 |
| 475 h | 26.19939281137258 | 47.31629380881873 | 23.76053970423197 | 476 h | 23.20237375489104 | 46.35842358475321 | 25.03288683441597 |
| 477 h | 24.17850643510843 | 44.46725420870185 | 37.48627454943845 | 478 h | 25.39583628441466 | 45.86890222951889 | 34.64693031355446 |
| 479 h | 27.52349709450548 | 44.51574778064946 | 36.91637956385897 | 480 h | 16.66807724024939 | 8.08867390946840  | 36.31209771107984 |
| 481 h | 19.44454059162364 | 8.77529873044246  | 38.13834979368698 | 482 h | 17.61515032937804 | 11.30793240905232 | 36.81592913518485 |
| 483 h | 33.46137393450717 | 4.88260035092132  | 37.83847599669168 | 484 h | 30.64278715562861 | 4.01170076914701  | 36.16048116571264 |
| 485 h | 33.40472453793023 | 4.99471443956032  | 34.44979537787837 | 486 h | 30.07949963301078 | 6.34770520592743  | 21.96917126846662 |
| 487 h | 29.65611348914608 | 5.03214629120134  | 25.06636004495051 | 488 h | 26.97639041171242 | 6.18435554991283  | 23.3353199904327  |
| 489 h | 22.95227161272814 | 7.68681034861459  | 16.15174143125236 | 490 h | 25.57663448839286 | 9.01691095688508  | 14.46204383453706 |
| 491 h | 22.57775810841179 | 10.60136458194628 | 14.45434149112469 | 492 h | 19.77210504355456 | 21.53428046739097 | 12.87434063862978 |
| 493 h | 20.18191616770876 | 18.55746330919087 | 14.45097968727597 | 494 h | 22.78772378108016 | 20.01282649360107 | 12.83001813512176 |
| 495 h | 38.62197654134481 | 12.92212462005696 | 15.58768696301715 | 496 h | 36.19720454498349 | 11.27070808632366 | 17.29260841374618 |
| 497 h | 38.03719750604287 | 13.65711509284137 | 18.84625789232310 | 498 h | 31.77801301891168 | 42.22877945630124 | 17.07885780896426 |
| 499 h | 34.32149917207656 | 41.46082605733769 | 19.19191608367668 | 500 h | 31.10419137014780 | 41.03034046216443 | 20.17894760161076 |
| 501 h | 37.22724605030760 | 22.21851125228343 | 13.65313042079537 | 502 h | 39.33210640813350 | 24.07120117225835 | 15.56752241126727 |
| 503 h | 36.87400434302388 | 25.57837415672299 | 13.77429250737877 | 504 h | 43.81735506686740 | 34.20235125705249 | 16.09756351203496 |
| 505 h | 46.30256980909965 | 33.14653461976353 | 18.15425166547856 | 506 h | 44.46608358685324 | 30.88753382474151 | 16.41317020572004 |
| 507 h | 46.99155306563688 | 21.51799901394221 | 18.41502154936811 | 508 h | 45.98392937172851 | 18.29875793102044 | 18.78993262654263 |
| 509 h | 47.49999961818116 | 19.91308496900294 | 21.35972653372416 | 510 h | 36.78290934867846 | 6.55034114270169  | 27.21090414345072 |
| 511 h | 34.50334591448535 | 8.74078694545083  | 28.46102298663753 | 512 h | 37.66134604667035 | 8.74760887300495  | 29.65409193176360 |
| 513 h | 46.25304505464051 | 14.94149398691739 | 34.05656977900532 | 514 h | 47.23697243612433 | 16.39967095856393 | 31.15367715824960 |
| 515 h | 45.64494505325328 | 13.40475095641977 | 31.09437271393694 | 516 h | 19.28598348666201 | 36.97510913200878 | 33.45034190754661 |

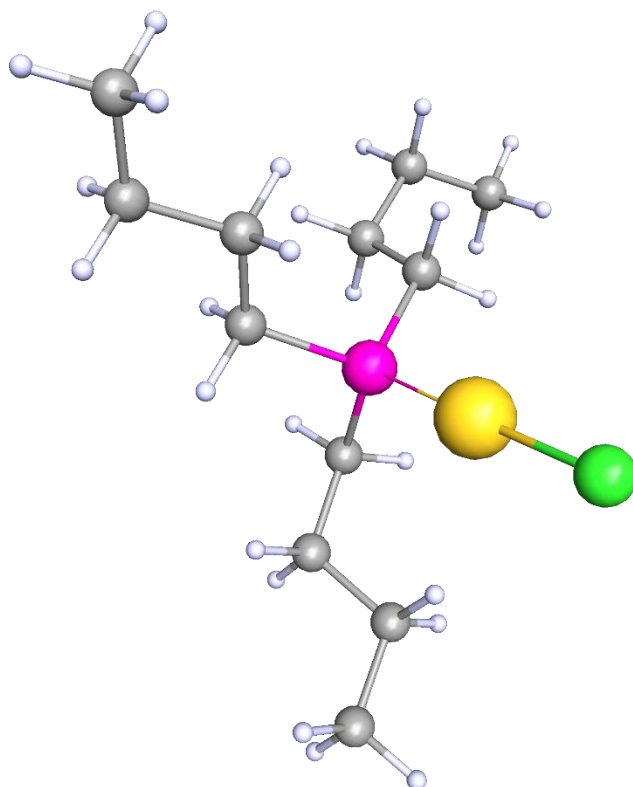

Figure S15: Geometry optimized structure of  $n\text{Bu}_3\text{PAuCl}$

Point group:  $C_1$

Energy: -1410.54298364668 H

HOMO-LUMO-Gap: 4.71 eV

|      |                   |                    |                   |      |                   |                    |                   |
|------|-------------------|--------------------|-------------------|------|-------------------|--------------------|-------------------|
| 1 au | 5.35984158231412  | -1.83224507267573  | 0.82343121059919  | 2 p  | 1.10581814270516  | -1.12737340454558  | 0.65959337531162  |
| 3 cl | 9.66870549872115  | -2.60307867963926  | 1.06588549929142  | 4 c  | -0.04590563174174 | 1.05776742941543   | -1.85269118890492 |
| 5 c  | -0.08524508189861 | 0.27622320686930   | 3.65869372500253  | 6 c  | -0.74781371650270 | -4.06600156814004  | 0.12944064528603  |
| 7 c  | -2.94358297688180 | 0.76248326566431   | 3.88188996925634  | 8 h  | 1.01896894830676  | 2.05144783926536   | 3.89378061485741  |
| 9 c  | -3.74782926116221 | 1.82899557517782   | 6.47588410044780  | 10 h | -3.56604351926293 | 2.09631007513263   | 2.37465912241984  |
| 11 h | -3.99054321415529 | -1.03318933577499  | 3.55084057244724  | 12 c | 0.97670362958723  | 0.56707725030365   | -4.54233161430340 |
| 13 h | -2.14670015714342 | 0.93607142392666   | -1.83214935258022 | 14 c | 3.63518576606858  | 1.62529298024140   | -5.04777536369226 |
| 15 h | 0.94556562158437  | -1.49800351289417  | -4.96634927854234 | 16 h | -0.37278446582511 | 1.43785298093254   | -5.90684680660247 |
| 17 h | -0.21548197014523 | -4.73305423663239  | -1.79516391698463 | 18 h | -2.79373139286210 | -3.56987558745871  | 0.05753935462908  |
| 19 c | -0.24283268855072 | -6.16076781463981  | 2.07962611788497  | 20 h | 1.83147782042879  | -6.51194308773053  | 2.19404006075200  |
| 21 h | -0.83171194799851 | -5.51054612009673  | 3.99604902180147  | 22 c | -1.61967341822131 | -8.64528957118756  | 1.45316682145091  |
| 23 h | -1.01499693280595 | -9.30176626305522  | -0.45605748678080 | 24 h | -3.69107908918385 | -8.27861938075030  | 1.31015612015837  |
| 25 c | -1.13351935754004 | -10.73899060716615 | 3.39891991019858  | 26 h | -1.78325988737946 | -10.16975266720187 | 5.31756779916199  |
| 27 h | -2.14546715776392 | -12.50774201004599 | 2.88528162131558  | 28 h | 0.91538262427624  | -11.19393591024921 | 3.53533802814735  |
| 29 h | 0.57493203748089  | -1.00646024718298  | 5.19161593130263  | 30 h | -5.85212170475547 | 1.87424630564404   | 6.53331183631381  |
| 31 h | -3.16008712120570 | 0.48096561115205   | 7.98591171345567  | 32 c | -2.72619789032769 | 4.47587498360566   | 7.07990173421691  |
| 33 h | -3.28986275718989 | 5.86777383662108   | 5.60488534830609  | 34 h | -0.62866075518592 | 4.50929749735664   | 7.21895251781839  |
| 35 h | -3.47583452414661 | 5.16672555891922   | 8.91746913740205  | 36 h | 3.61671010321805  | 3.70419547761437   | -4.69779634318574 |
| 37 c | 4.57295430910861  | 1.09426903905527   | -7.73755861261171 | 38 h | 4.99446445478564  | 0.81250049442407   | -3.65584541826366 |
| 39 h | 3.28469869397423  | 1.91878848502491   | -9.18429767628727 | 40 h | 6.48445066044766  | 1.90881708566542   | -8.04726451697936 |
| 41 h | 4.70373239764347  | -0.97293013039618  | -8.10607909089020 | 42 h | 0.45624049567508  | 3.00564301221397   | -1.23021703739084 |

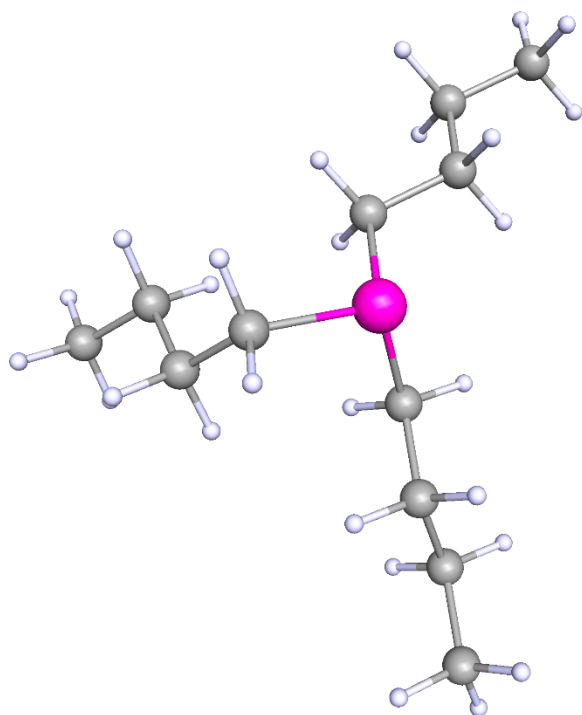

Figure S16: Geometry optimized structure of  $n\text{Bu}_3\text{P}$

Point group:  $C_1$

Energy: -814.44171774973

HOMO-LUMO-Gap: 5.571 eV

|      |                   |                    |                   |      |                   |                    |                    |
|------|-------------------|--------------------|-------------------|------|-------------------|--------------------|--------------------|
| 1 p  | 1.08324971646512  | -0.71518109412445  | 0.06702941602759  | 2 c  | -0.55728627093723 | 1.25887359692706   | -2.40885273362709  |
| 3 c  | 0.05280047590567  | 0.75550067810789   | 3.15993621326821  | 4 c  | -0.91078335749772 | -3.65682810888719  | -0.09006861510340  |
| 5 c  | -2.69908294398483 | 0.70903184881696   | 4.11684011582322  | 6 h  | 0.76245048327801  | 2.74041281899702   | 3.08679044773232   |
| 7 h  | -2.66324877369267 | 1.21733047796494   | 6.16563044226679  | 8 c  | -4.56568846116949 | 2.49343136482490   | 2.78370320156902   |
| 9 h  | -3.45066399592255 | -1.25953890348683  | 4.05477174242161  | 10 c | 0.56436981199425  | 0.83892779237710   | -5.06017184415184  |
| 11 h | -2.62999116135323 | 0.88624112812252   | -2.43622892232333 | 12 h | 2.63412273508842  | 1.23219931629977   | -5.00811610612770  |
| 13 h | 0.38527182958256  | -1.19380321317389  | -5.59616557807705 | 14 c | -0.68417031827496 | 2.46946444404838   | -7.11919267992828  |
| 15 h | -0.75552358624689 | -4.34191796890885  | -2.07746643941668 | 16 h | -2.94665355998844 | -3.20457345991993  | 0.22193097099955   |
| 17 c | -0.03880053996891 | -5.75177300189502  | 1.72510868068386  | 18 h | 2.01296103453597  | -6.12593986272509  | 1.41794938758057   |
| 19 h | -0.20765031137393 | -5.08371366427262  | 3.71846226477267  | 20 c | -1.52791365810426 | -8.23327408056112  | 1.43459053418307   |
| 21 h | -1.35387086274072 | -8.91038548783955  | -0.55458086584213 | 22 h | -3.57966315762766 | -7.84969663905572  | 1.73234251470830   |
| 23 c | -0.65879660456568 | -10.32127224970545 | 3.24960398013446  | 24 h | -0.87529161635240 | -9.72961953586964  | 5.25764608903539   |
| 25 h | -1.77235417907994 | -12.08483432565737 | 2.98518415301357  | 26 h | 1.36859839319799  | -10.79939884478572 | 2.95094788875951   |
| 27 h | -0.31402361292576 | 3.27504080599148   | -1.84836979278312 | 28 h | 1.27412932489275  | -0.19807433872721  | 4.58673848482138   |
| 29 c | -7.17727171325515 | 2.54600576833424   | 4.04499312797988  | 30 h | -3.75859944071823 | 4.44107232376203   | 2.75648354018027   |
| 31 h | -4.78135252465184 | 1.93391226739803   | 0.76858809881370  | 32 h | -7.05002501193595 | 3.18669368535858   | 6.04576404220054   |
| 33 h | -8.06229718163879 | 0.63635957775034   | 4.05358708539524  | 34 h | -8.49081840509964 | 3.84725825834894   | 3.04437650533863   |
| 35 h | -2.75307451161616 | 2.06528724056312   | -7.16452420441622 | 36 h | -0.50929353801616 | 4.50227874398275   | -6.58702341388002  |
| 37 c | 0.44269813912442  | 2.05735025721973   | -9.75929369513301 | 38 h | -0.50173950498114 | 3.26551421359548   | -11.19758629589952 |
| 39 h | 2.49629712099271  | 2.51500599328194   | -9.79461990823687 | 40 h | 0.23503129436891  | 0.05607532274901   | -10.37648485788198 |

## 6. References

- [1] Gienger, C., Schynowski, L., Schaefer, J., Schrenk, C., Schnepf, A., *Eur. J. Inorg. Chem.* **2023**, 26, e202200738.
- [2] Kenzler, S.; Fetzer, F.; Schrenk, C.; Pollard, N.; Frojd, A.R.; Clayborne, A.Z.; Schnepf. *Angew. Chem. Int. Ed.* **2019**, 58, 5902–5905.
- [3] (a) G. M. Sheldrick, *Acta Crystallogr.* **2008**, A64, 112–122. (b) G. M. Sheldrick, *Acta Crystallogr., Sect. C: Struct. Chem.* **2015**, C71, 3–8.
- [4] O. V. Dolomanov, L. J. Bourhis, R. J. Gildea, J. A. K. Howard, H. Puschmann, *J. Appl. Crystallogr.* 2009, 42, 339–341.
